1 Septate junctions regulate gut homeostasis through regulation of stem cell proliferation  
2 and enterocyte behavior in *Drosophila*

3

4 Yasushi Izumi<sup>1,2</sup>, Kyoko Furuse<sup>1</sup>, and Mikio Furuse<sup>1,2</sup>

5

6 <sup>1</sup>Division of Cell Structure, National Institute for Physiological Sciences, Okazaki,  
7 Japan

8 <sup>2</sup>Department of Physiological Sciences, SOKENDAI, Okazaki, Japan

9

10 Address correspondence and proofs to:

11 Yasushi Izumi, PhD, Division of Cell Structure, National Institute for Physiological  
12 Sciences, 5-1 Higashiyama, Myodaiji, Okazaki 444-8787, Japan

13 Tel: +81-564-59-5279; Fax: +81-564-59-5275; E-mail: yizumi@nips.ac.jp

14

15 **Running title:** Septate junctions and gut homeostasis

16

17 **Keywords:** *Drosophila*, midgut, smooth septate junction, epithelial cell, intestinal stem  
18 cell, tissue homeostasis

19

19 **Summary statement:** Depletion of smooth septate junction-associated proteins from  
20 enterocytes in the *Drosophila* adult midgut results in intestinal hypertrophy  
21 accompanied by accumulation of morphologically aberrant enterocytes and increased  
22 stem cell proliferation.

23

#### 24 **Abstract**

25 Smooth septate junctions (sSJs) contribute to the epithelial barrier, which restricts  
26 leakage of solutes through the paracellular route of epithelial cells in the *Drosophila*  
27 midgut. We previously identified three sSJ-associated membrane proteins, Ssk, Mesh,  
28 and Tsp2A, and showed that these proteins were required for sSJ formation and  
29 intestinal barrier function in the larval midgut. Here, we investigated the roles of sSJs in  
30 the *Drosophila* adult midgut. Depletion of any of the sSJ-proteins from enterocytes  
31 resulted in remarkably shortened lifespan and intestinal barrier dysfunction in flies.  
32 Interestingly, the sSJ protein-deficient flies showed intestinal hypertrophy accompanied  
33 by accumulation of morphologically abnormal enterocytes. The phenotype was  
34 associated with increased stem cell proliferation and activation of the MAP kinase and  
35 Jak-Stat pathways in stem cells. Loss of cytokines Unpaired2 and Unpaired3, which are  
36 involved in Jak-Stat pathway activation, suppressed the intestinal hypertrophy, but not  
37 the increased stem cell proliferation, in flies lacking Mesh. The present findings suggest  
38 that SJs play a crucial role in maintaining tissue homeostasis through regulation of stem  
39 cell proliferation and enterocyte behavior in the *Drosophila* adult midgut.

40

## 40 **Introduction**

41 The intestinal epithelium serves as a physical barrier that prevents infiltration of  
42 food-derived harmful substances, microbial contaminants, and digestive enzymes into  
43 the body. To constitute an effective intestinal barrier, specialized cell-cell junctions,  
44 namely occluding junctions, play a crucial role in regulating free diffusion of solutes  
45 through the paracellular route. Septate junctions (SJs) are occluding junctions in  
46 invertebrates and act as the functional counterparts of vertebrate tight junctions  
47 (Anderson and Van Itallie, 2009, Furuse and Tsukita, 2006, Lane, 1994, Tepass and  
48 Hartenstein, 1994). In arthropods, morphological variation of SJs has been observed  
49 among different types of epithelia (Lane, 1994, Tepass and Hartenstein, 1994). Most  
50 ectodermally-derived epithelia and the perineural sheath have pleated SJs (pSJs), while  
51 endodermally-derived epithelia, including the midgut, have smooth SJs (sSJs) (Lane,  
52 1994, Tepass and Hartenstein, 1994). Genetic and molecular analyses in *Drosophila*  
53 have revealed a number of molecular components and functional properties of pSJs  
54 (Tepass et al., 2001, Wu and Beitel, 2004, Banerjee et al., 2006, Izumi and Furuse,  
55 2014). In contrast, few studies have been carried out on sSJs, and their physiological  
56 role is not well understood. Recently, we identified three sSJ-specific membrane  
57 proteins: Ssk, Mesh, and Tsp2A. Ssk is a four transmembrane domain-containing  
58 protein (Yanagihashi et al., 2012). Mesh is a single-pass membrane protein containing a  
59 large extracellular region (Izumi et al., 2012). Tsp2A belongs to the tetraspanin family  
60 (Izumi et al., 2016). Zygotic loss of any of these proteins results in embryonic lethality  
61 just before hatching or at the 1st instar larva stage with impairment of sSJ formation as

62 well as epithelial barrier function, suggesting critical roles of sSJs (Yanagihashi et al.,  
63 2012, Izumi et al., 2012, Izumi et al., 2016, Izumi and Furuse, 2014, Furuse and Izumi,  
64 2017).

65         The *Drosophila* adult midgut epithelium is composed of absorptive  
66 enterocytes (ECs), secretory enteroendocrine cells (EEs), intestinal stem cells (ISCs),  
67 EC progenitors (enteroblasts: EBs), and EE progenitors (enteroendocrine mother cells:  
68 EMCs) (Micchelli and Perrimon, 2006, Ohlstein and Spradling, 2006, Guo and Ohlstein,  
69 2015). The sSJs are formed between adjacent ECs and between ECs and EEs  
70 (Resnik-Docampo et al., 2017). ECs and EEs are continuously renewed by proliferation  
71 and differentiation of the ISC lineage through the production of intermediate  
72 differentiating cells, EBs and EMCs. This renewal of adult midgut epithelial cells is  
73 critical for maintenance of homeostasis in the adult midgut. Recent studies have  
74 suggested that sSJs influence proliferation and differentiation of the ISC lineage in the  
75 adult midgut. Experimental suppression of Gliotactin, a tricellular junction-associated  
76 protein, in ECs led to epithelial barrier dysfunction, increased ISC proliferation, and  
77 blockade of EC differentiation in young flies (Resnik-Docampo et al., 2017). Moreover,  
78 loss of *mesh* and *Tsp2A* in clones caused defects in polarization and integration of ECs  
79 in the adult midgut (Chen et al., 2018). Thus, it will be interesting to examine the role of  
80 sSJs in the adult midgut in terms of the regulation of ISC proliferation and tissue  
81 homeostasis by genetic ablation of the sSJ-protein genes throughout ECs.

82         Here, we describe that depletion of the sSJ-proteins Ssk, Mesh, and Tsp2A  
83 from ECs causes remarkably reduced lifespan and midgut barrier dysfunction in flies.

84 The sSJ protein-deficient flies show intestinal hypertrophy accompanied by  
85 accumulation of morphologically aberrant ECs and increased stem cell proliferation.  
86 Interestingly, we show that the interleukin-6-like cytokines Unpaired2 and/or Unpaired3  
87 are involved in this intestinal hypertrophy. We conclude that sSJs are crucial for the  
88 regulation of stem cell proliferation and EC behavior in the *Drosophila* adult midgut.

89

## 90 **Results**

### 91 **Depletion of sSJ-proteins from ECs in adult flies results in shortened lifespan and** 92 **midgut barrier dysfunction**

93 To investigate the effect of sSJ-protein depletion on the *Drosophila* adult midgut,  
94 UAS-RNAi lines for sSJ-proteins were expressed in ECs using a *Myo1A*-Gal4 driver,  
95 combined with a temporal and regional gene expression targeting (TARGET) system  
96 (Zeng et al., 2010). The UAS-RNAi lines used for the sSJ-proteins were  
97 UAS-*ssk*-RNAi, *mesh*-RNAi (15074R-1), and *Tsp2A*-RNAi (11415R-2), which were  
98 confirmed to effectively reduce the expression of their respective sSJ-proteins  
99 (Yanagihashi et al., 2012, Izumi et al., 2012, Izumi et al., 2016). *Myo1A*-Gal4  
100 tubGal80<sup>ts</sup> UAS-*CD8-GFP* and UAS-*ssk*-RNAi, *mesh*-RNAi, or *Tsp2A*-RNAi  
101 (*Myo1A*<sup>ts</sup>> *ssk*-RNAi, *mesh*-RNAi, or *Tsp2A*-RNAi) flies were raised to adults at 18°C  
102 and then shifted to 29°C to express each UAS-driven transgene. Almost all flies  
103 expressing the RNAis targeting the sSJ-protein transcripts (hereafter referred to as  
104 sSJp-RNAis) died within 10 days after transgene induction, while more than 95% of  
105 control flies (*Myo1A*<sup>ts</sup>> *CD8-GFP*) survived until 15 days after induction (Fig. 1A).

106 Thus, reduced expression of sSJ-proteins in ECs results in remarkably shortened  
107 lifespan in adult flies. Next, we examined whether the barrier function of the midgut  
108 was disrupted in sSJp-RNAi flies. According to the method of a barrier integrity  
109 assay/Smurf assay method (Rera et al., 2011, Rera et al., 2012), flies were fed a  
110 non-absorbable 800-Da blue food dye in sucrose solution and observed for leakage of  
111 the dye from the midgut. At 3 days after transgene induction, reduced expression of any  
112 of the sSJ-proteins in ECs led to a significant increase in flies with blue dye throughout  
113 their body cavity, indicating defective midgut barrier function (Fig. 1C). Flies with  
114 midgut barrier dysfunction were further increased at 5 days after transgene induction,  
115 compared with age-matched controls (Fig. 1B, C). Thus, we confirmed that sSJ-proteins  
116 are required for the barrier function in the adult midgut, similar to the observations in  
117 the larval midgut (Yanagihashi et al., 2012, Izumi et al., 2012, Izumi et al., 2016).

118

119 **Depletion of sSJ-proteins from ECs leads to intestinal hypertrophy accompanied**  
120 **by accumulation of morphologically aberrant ECs in the midgut**

121 The shortened lifespan and midgut barrier dysfunction in sSJ-protein-deficient flies  
122 prompted us to examine the organization of their midgut epithelium. At 5 days after  
123 transgene induction, a typical simple epithelium in which ECs expressed CD8-GFP  
124 driven by *Myo1A*-Gal4 was observed in the control midgut (Fig. 2A, E). Intriguingly,  
125 the organization of the epithelium was severely disrupted in the sSJp-RNAi midgut: a  
126 large number of ECs failed to become integrated into the epithelium and instead  
127 accumulated throughout the midgut lumen (Fig. 2B–D). In addition, the ECs exhibited a

128 variety of aberrant appearances, implying a polarity defect (Fig. 2B–D). Indeed,  
129 abnormal distributions of actin and Dlg, a cell polarity protein, were observed in  
130 sSJp-RNAi ECs (Fig. 2B–D and Fig. S1). The most posterior part of the midgut had a  
131 hypertrophic phenotype: the lumen was filled with a large number of morphologically  
132 aberrant ECs and the diameter was severely expanded (Fig. 2F–I). We confirmed that  
133 expression of sSJp-RNAi in ECs led to decreased levels of the respective target  
134 proteins and mislocalization of other sSJ-proteins in the midgut (Fig. S2). Additional  
135 RNAi lines for *mesh* and *Tsp2A* showed essentially the same phenotypes (Fig. S3).  
136 Toluidine blue staining of semi-thin sections and ultrastructural analysis by  
137 transmission electron microscopy confirmed that morphologically aberrant cells were  
138 stratified in the sSJp-RNAi midgut (Fig. 2K–M, O–Q), while a monolayer of ECs with  
139 developed microvilli facing the lumen was observed in the control midgut (Fig. 2J, N).  
140 Notably, microvilli-like structures were often observed between stratified ECs in the  
141 sSJp-RNAi midgut (Fig. 2O, Q–S). Thus, depletion of any of the sSJ-proteins from  
142 ECs causes intestinal hypertrophy accompanied by dysplasia-like accumulation of ECs  
143 in the midgut lumen, suggesting that sSJs are required for homeostasis of the midgut  
144 organization.

145

146 **Depletion of sSJ-proteins from ECs leads to increased ISC proliferation in the**  
147 **midgut**

148 We speculated that the EC accumulation was caused by overproduction of ECs in the  
149 sSJp-RNAi midgut. Because regeneration of ECs depends on proliferation and

150 differentiation of the ISC lineage, we examined whether proliferation of ISCs was  
151 increased in the sSJp-RNAi midgut. We stained the midgut with an antibody against  
152 phospho-histone H3 (PH3), a mitotic marker, and found that PH3-positive cells were  
153 markedly increased in the sSJp-RNAi midgut compared with the control midgut (Fig.  
154 3A–D, M). Furthermore, immunostaining of the midgut with an antibody against Delta,  
155 an ISC marker, revealed that ISCs were increased in the sSJp-RNAi midgut compared  
156 with the control midgut (Fig. 3A–D, M). We also confirmed that PH3-positive cells  
157 were Delta-positive (Fig. 3A–D). Furthermore, the number of cells expressing Escargot  
158 (*Esg*)-LacZ, an ISC/EB marker, was increased in the *ssk*- or *mesh*-RNAi midgut (Fig.  
159 S4A–C). These results indicate that reduced expression of sSJ-proteins in ECs leads to  
160 increased ISC proliferation. Of note, *Esg*-LacZ signals were often observed in cells  
161 expressing CD8-GFP driven by *Myo1A*-GAL4 in the *ssk*- or *mesh*-RNAi midgut (Fig.  
162 S4E–F’), suggesting that sSJ-protein depletion causes mis-differentiation of the ISC  
163 lineage in the midgut.

164           In the adult midgut, the Ras-MAP kinase and Jak-Stat signaling pathways are  
165 required for activation of ISC proliferation during the regeneration of epithelial cells  
166 (Buchon et al., 2010, Biteau and Jasper, 2011, Jiang and Edgar, 2009, Jiang et al., 2011,  
167 Osman et al., 2012, Zhou et al., 2013). Therefore, we examined whether these signaling  
168 pathways were activated in the sSJp-RNAi midgut. To monitor Ras-MAP kinase  
169 pathway activity, we examined the levels of phosphorylated ERK (dpERK) (Gabay et  
170 al., 1997). In control flies, dpERK signals were barely detectable in the midgut (Fig. 3E  
171 and Fig. S5A). In contrast, intense dpERK signals were observed in the sSJp-RNAi



172 midgut, not only in cells residing on the basal side of the epithelium, but also in some  
173 ECs (Fig. 3F–H and Fig. S5B–D), strongly suggesting that the Ras-MAP kinase  
174 pathway was activated in ISCs, EBs, and certain ECs. To monitor Jak-Stat pathway  
175 activity, we used a Stat92E reporter line driving expression of DGFP (*10xSTAT-DGFP*).  
176 In the control midgut, few DGFP-positive cells were observed (Fig. 3I and Fig. S5E, I),  
177 while DGFP-positive cells were markedly increased on the basal side of the epithelium  
178 throughout the sSJp-RNAi midgut (Fig. 3J–L and Fig. S5F–H, J–L). In addition,  
179 dpERK- and DGFP-positive signals were detected in Esg-LacZ-positive cells in the  
180 *mesh*-RNAi midgut (Fig. S6), indicating that the MAP kinase and Jak-Stat pathways  
181 were activated in the progenitor cells in the sSJ-disrupted midgut. Collectively, these  
182 results demonstrate that depletion of sSJ-proteins from ECs results in activation of both  
183 the Ras-MAP kinase and Jak-Stat signaling pathways in the midgut.

184

185 **Simultaneous loss of *unpaired2* and *unpaired3* suppresses the abnormal**  
186 **accumulation of ECs in the *mesh*-deficient midgut**

187 In ISC proliferation and EB differentiation, the Jak-Stat signaling pathway is activated  
188 by cytokines known as Unpaired (Upd) ligands (Jiang et al., 2009, Osman et al., 2012,  
189 Zhou et al., 2013). Upd2 and Upd3 were reported to contribute to increased ISC  
190 division in the midgut upon aging or exposure to stress (Osman et al., 2012). To  
191 examine whether Upd2 and Upd3 were involved in the increased ISC proliferation and  
192 abnormal accumulation of ECs observed in the sSJp-RNAi midgut, we suppressed  
193 *mesh* expression in the midgut of *upd2* and *upd3* double-mutant (*upd2,3<sup>d</sup>*) flies by

194 expression of *mesh*-RNAi. In the *mesh*-RNAi *upd2,3<sup>d</sup>* midgut, a large number of mitotic  
195 cells were still observed and showed a similar level to the *mesh*-RNAi midgut (Fig. 4B,  
196 C, G), while only a few mitotic cells were detected in the control and *upd2,3<sup>d</sup>* midgut  
197 (Fig. 4A, G). Meanwhile, the expansion of the midgut observed in *mesh*-RNAi flies was  
198 significantly suppressed in *mesh*-RNAi *upd2,3<sup>d</sup>* flies. At 3 days after RNAi induction,  
199 the diameter of the most posterior region of the midgut in *mesh*-RNAi *upd2,3<sup>d</sup>* flies was  
200 significantly smaller than that in *mesh*-RNAi flies and was similar to the *upd2,3<sup>d</sup>* flies  
201 and control flies (Fig. 4H). At 5 days after RNAi induction, the suppressive effect of  
202 *upd2,3<sup>d</sup>* in *mesh*-RNAi flies in the midgut diameter appeared to be more remarkable,  
203 but it may include the influence of *upd2,3<sup>d</sup>* alone on the midgut because the diameter of  
204 the most posterior region of the midgut in *upd2,3<sup>d</sup>* flies is smaller than that in control  
205 flies in this condition (Fig. 4D–F, H). Accumulation of ECs was still observed in  
206 *mesh*-RNAi *upd2,3<sup>d</sup>* flies (Fig. 4F). The *upd2,3<sup>d</sup>* flies expressing *mesh*-RNAi in ECs  
207 exhibited a shortened lifespan, resembling that in *mesh*-RNAi flies (Fig. S7A). The  
208 midgut barrier dysfunction seen in *mesh*-RNAi flies was also observed in *mesh*-RNAi  
209 *upd2,3<sup>d</sup>* flies (Fig. S7B), suggesting that Upd2 and Upd3 do not contribute to the loss of  
210 barrier function in the midgut. Taken together, our observations suggest that induction  
211 of Upd2 and/or Upd3 expression is responsible for the aberrant behavior of ECs in the  
212 sSjP-RNAi midgut.

213

214 ***Tsp2A*-mutant clones induce non-cell-autonomous stem cell proliferation**

215 To further validate the effects of sSJ-protein depletion on the adult midgut, we  
216 generated mitotic clones that lacked *Tsp2A* and simultaneously expressed GFP in the  
217 ISC lineage using the mosaic analysis with a repressible cell marker (MARCM) system  
218 (Lee and Luo, 2001). The clone size, indicated by the number of GFP-positive cells per  
219 clone, of *Tsp2A*-mutant clones was comparable to that of control clones (Fig. 5A, B, G).  
220 However, an increased number of PH3-positive cells outside the mutant clones was  
221 observed in *Tsp2A*-mutant clones compared with control clones (Fig. 5A, B, H). These  
222 results indicate that loss of *Tsp2A* in ECs has a non-cell-autonomous effect on ISC  
223 proliferation. In addition, immunostaining with anti-Pdm1 and anti-Prospero (Pros)  
224 antibodies, which label ECs and EEs, respectively (Micchelli and Perrimon, 2006,  
225 Ohlstein and Spradling, 2006), revealed that *Tsp2A*-mutant clones contained  
226 differentiated ECs and EEs (Fig. 5C–F). These results suggest that loss of *Tsp2A* does  
227 not block differentiation of the ISC lineage.

228

## 229 **Discussion**

230 In the *Drosophila* midgut epithelium, the paracellular barrier is constructed by  
231 specialized cell-cell junctions known as sSJs (Tepass and Hartenstein, 1994). Our  
232 previous studies revealed that three sSJ-associated membrane proteins, Ssk, Mesh, and  
233 Tsp2A, are essential for the organization and function of sSJs (Yanagihashi et al., 2012,  
234 Izumi et al., 2012, Izumi et al., 2016). In this study, we depleted the sSJ-proteins from  
235 ECs in the *Drosophila* adult midgut and showed that they are also required for the  
236 barrier function in the adult midgut epithelium. Interestingly, the reduced expression of

237 sSJ-proteins in ECs led to remarkably shortened lifespan in adult flies, increased ISC  
238 proliferation, and intestinal hypertrophy accompanied by accumulation of  
239 morphologically aberrant ECs in the midgut. The intestinal hypertrophy caused by *mesh*  
240 depletion was suppressed by loss of *upd2* and *upd3* without profound suppression of  
241 ISC proliferation, recovery of the shortened lifespan, and recovery of the midgut barrier  
242 dysfunction. We also found that *Tsp2A*-mutant clones promoted ISC proliferation in a  
243 non-cell-autonomous manner. Taken together, we propose that sSJs play a crucial role  
244 in maintaining tissue homeostasis through regulation of ISC proliferation and EC  
245 behavior in the *Drosophila* adult midgut. The adult *Drosophila* intestine provides a  
246 powerful model to investigate the molecular mechanisms behind the emergence and  
247 progression intestinal metaplasia and dysplasia, which are associated with  
248 gastrointestinal carcinogenesis in mammals (Li and Jasper, 2016). Given that  
249 *Drosophila* intestinal dysplasia is associated with over-proliferation of ISCs and their  
250 abnormal differentiation, the intestinal hypertrophy observed in the present study should  
251 be categorized as a typical dysplasia in the *Drosophila* intestine.

252         Based on our observations, we hypothesize the following scenario for the  
253 hypertrophy generation in the sSJ-protein-deficient midgut. First, depletion of  
254 sSJ-proteins from ECs leads to disruption of sSJs in the midgut. Second, the impaired  
255 midgut barrier function caused by disruption of sSJs results in leakage of harmful  
256 substances from the intestinal lumen, thereby inducing the expression of cytokines and  
257 growth factors, such as Upd and EGF ligands, in the midgut. Alternatively, disruption  
258 of sSJs causes direct activation of a particular signaling pathway that induces expression

259 of cytokines and growth factors by ECs. Third, proliferation of ISCs is promoted by  
260 activation of the Jak-Stat and Ras-MAP kinase pathways. Fourth, EBs produced by the  
261 asymmetric division of ISCs differentiate into ECs with impaired sSJs in response to  
262 cytokines such as Upd2 and/or Upd3. Fifth, the ECs fail to integrate into the epithelial  
263 layer because of insufficient cell-cell adhesion caused by impaired sSJs, and thus  
264 become stratified in the midgut lumen to generate hypertrophy. Interestingly, loss of  
265 *upd2* and *upd3* suppressed the intestinal hypertrophy caused by depletion of *mesh*, but  
266 not the increased ISC proliferation. These findings imply that Upd2 and/or Upd3  
267 preferentially promote EB differentiation rather than ISC proliferation. Considering that  
268 Upd-Jak-Stat signaling is required for both ISC proliferation and EB differentiation  
269 (Jiang et al., 2009), Upd2 and/or Upd3 may predominantly promote EB differentiation  
270 and accumulation of ECs, while other cytokines such as Upd1 and/or EGF ligands may  
271 activate ISC proliferation in the sSJ-disrupted midgut. In this study, we observed  
272 abnormal morphology and aberrant F-actin and Dlg distributions in *ssk-*, *mesh-*, and  
273 *Tsp2A*-RNAi ECs. Consistent with our results, Chen et al. (2018) recently reported that  
274 loss of *mesh* and *Tsp2A* in clones causes defects in polarization and integration of ECs  
275 in the adult midgut. In contrast, no remarkable defects in the organization and polarity  
276 of ECs were observed in the *ssk-*, *mesh-*, and *Tsp2A*-mutant midgut in first-instar larvae  
277 (Yanagihashi et al., 2012, Izumi et al., 2012, Izumi et al., 2016), suggesting that  
278 sSJ-proteins are not required for establishment of the initial epithelial apical-basal  
279 polarity. This discrepancy may be explained by the marked difference between the  
280 larval and adult midguts: ECs in the larval midgut are postmitotic, while those in the

281 adult midgut are capable of regeneration by the stem cell system (Lemaitre and  
282 Miguel-Aliaga, 2013). In the sSJ protein-deficient adult midgut, activated proliferation  
283 of ISCs generates excessive ECs. These ECs may lack sufficient cell-cell adhesion  
284 because of impaired sSJs, fail to become integrated into the epithelial layer, and detach  
285 from the basement membrane, leading to loss of normal polarity. Because sSJs seem to  
286 be the sole continuous intercellular contacts between adjacent epithelial cells in the  
287 midgut (Tepass and Hartenstein, 1994, Baumann, 2001), it is reasonable to speculate  
288 that sSJ-disrupted ECs have reduced cell-cell adhesion ability.

289           A recent study revealed that depletion of the tricellular junction protein  
290 Gliotactin from ECs leads to epithelial barrier dysfunction, increased ISC proliferation,  
291 and blockade of differentiation in the midgut of young adult flies (Resnik-Docampo et  
292 al., 2017). In contrast to the findings after depletion of sSJ-proteins in the present study,  
293 the *gliotactin*-deficient midgut does not appear to exhibit intestinal hypertrophy  
294 accompanied by accumulation of ECs throughout the midgut. Furthermore, the lifespan  
295 of *gliotactin*-deficient flies is longer than that of sSJ-protein-deficient flies. The  
296 difference in phenotypes between the two studies may reflect the difference in the  
297 degrees of sSJ deficiency: disruption of entire bicellular sSJs or tricellular sSJs only.  
298 Aging was also reported to be correlated with barrier dysfunction, increased ISC  
299 proliferation, and accumulation of aberrant cells in the adult midgut (Biteau et al., 2008,  
300 Rera et al., 2012). The hypertrophy formation in the sSJ-disrupted midgut accompanied  
301 by increased ISC proliferation and accumulation of aberrant ECs raise the possibility

302 that disruption of sSJs is the primary cause of the alterations in the midgut epithelium  
303 with aging.

304           During the preparation of our manuscript, two groups published interesting  
305 phenotypes of the sSJ-protein-deficient adult midgut in *Drosophila* that are highly  
306 related to the present study. Salazar et al. (2018) reported that reduced expression of *ssk*  
307 in ECs leads to gut barrier dysfunction, altered gut morphology, increased stem cell  
308 proliferation, dysbiosis, and reduced lifespan. They also showed that up-regulation of  
309 Ssk in the midgut protects flies against microbial translocation, limits dysbiosis, and  
310 prolongs lifespan. Meanwhile, Xu et al. (2018) reported that depletion of *Tsp2A* from  
311 ISCs/EBs causes accumulation of ISCs/EBs and a swollen midgut with multilayered  
312 epithelium, similar to our observations. They also showed that knockdown of *ssk* and  
313 *mesh* in ISCs/EBs results in accumulation of ISCs/EBs. Importantly, they demonstrated  
314 that *Tsp2A* depletion from ISCs/EBs causes excessive aPKC-Yki-JAK-Stat activity and  
315 leads to increased stem cell proliferation in the midgut. They further showed that *Tsp2A*  
316 is involved in endocytic degradation of aPKC, which antagonizes the Hippo pathway.  
317 Their results strongly suggest that sSJs are directly involved in the regulation of  
318 intracellular signaling for ISC proliferation. In their study, *Tsp2A* knockdown in  
319 ISCs/EBs caused no defects in the midgut barrier function, in contrast to the present  
320 study. This discrepancy may be due to differences in the GAL4 drivers used in each  
321 study or the conditions for the barrier integrity assay/Smurf assay. In addition, Xu et al.  
322 (2018) mentioned that MARCM clones generated from ISCs expressing *Tsp2A*-RNAi  
323 grow much larger than control clones, while we found no remarkable size difference

324 between Tsp2A mutant clones and control clones. Such discrepancies need to be  
325 reconciled by future investigations. To further clarify the mechanistic details for the role  
326 of sSJs in stem cell proliferation, it will be interesting to analyze the effects of  
327 sSJ-protein depletion on the behavior of adult Malpighian tubules, which also have sSJs,  
328 as well as on a stem cell system (Singh et al., 2007).

329         In this study, we have demonstrated that sSJs play a crucial role in  
330 maintaining tissue homeostasis through regulation of ISC proliferation and EC behavior  
331 in the *Drosophila* adult midgut. Our sequential identification of the sSJ-proteins Ssk,  
332 Mesh, and Tsp2A has provided a *Drosophila* model system that can be used to elucidate  
333 the roles of the intestinal barrier function by experimental dysfunction of sSJs in the  
334 midgut. However, as described in this study, simple depletion of sSJ-proteins  
335 throughout the adult midgut causes phenotypes that are too drastic, involving not only  
336 disruption of the intestinal barrier function but also intestinal dysplasia and subsequent  
337 lethality. To investigate the systemic effects of intestinal barrier impairment throughout  
338 the life course of *Drosophila*, more modest depletion of sSJ-proteins is needed for  
339 future studies.

340

## 341 **Material and Methods**

### 342 **Fly stocks**

343 Fly stocks were reared on a standard cornmeal fly medium at 25°C. *w<sup>1118</sup>* flies were  
344 used as wild-type flies unless otherwise specified. The other fly stocks used were: *y w*;  
345 *Myo1A-GAL4* (#112001; Drosophila Genetic Resource Center (DGRC), Kyoto, Japan),



346 *tubP*-GAL80<sup>ts</sup> (#7019; Bloomington Drosophila Stock Center (BDSC), Bloomington,  
347 IN), *y w*; CD8-GFP (#108068; DGRC), *y w*; *Pin<sup>Y1</sup>/CyO*; UAS-*mCD8-GFP* (#5130;  
348 BDSC), *w*; *10xStat92E-DGFP/CyO* (#26199; BDSC), *w*; *10xStat92E-DGFP/TM6C Sb*  
349 *Tb* (#26200; BDSC), *y w*; *esg-lacZ/CyO* (#108851; DGRC), FRT19A; *ry* (#106464;  
350 DGRC).

351 The RNAi lines used were: *ssk*-RNAi (Yanagihashi et al., 2012), *mesh*-RNAi  
352 (#12074R-1, 12074R-2; Fly Stocks of National Institute of Genetics (NIG-Fly),  
353 Mishima, Japan) (Izumi et al., 2012), *Tsp2A*-RNAi (#11415R-2; NIG-Fly *Tsp2AIR1-2*)  
354 (Izumi et al., 2016), *w*-RNAi (#28980; BDSC).

355 The mutant stocks used were: *Tsp2A<sup>1-2</sup>* (Izumi et al., 2016), *w upd2<sup>Delta</sup> upd3<sup>Delta</sup>*  
356 (#55729; BDSC).

357 The following stocks were used to generate positively-marked MARCM clones:  
358 *tub<sup>P</sup>*-GAL80 *w* FRT19A; *Act5C*-GAL4, UAS-*GFP/CyO* (#42726; BDSC), FRT19A  
359 *tub<sup>P</sup>*-GAL80 *hsFLP w*; UAS-*mCD8GFP* (#108065; DGRC).

360

### 361 **Conditional expression of UAS transgenes (TARGET system)**

362 Flies are crossed and grown at 18°C until eclosion. Adult flies at 2–5 days after eclosion  
363 were collected and transferred to 29°C for inactivation of Gal80. All analyses for these  
364 experiments were performed on female flies, because their age-related gut pathology is  
365 well established (Lemaitre and Miguel-Aliaga, 2013).

366

### 367 **MARCM clone induction**

368 Flies were crossed at 18°C. At 2–5 days after eclosion, adult flies were heat-shocked at  
369 37°C for 1 h twice daily. Adult flies were transferred to fresh vials every 2–3 days and  
370 maintained at 25°C for 10 days after clone induction before being dissected.

371

### 372 **Immunostaining**

373 Adult flies were dissected in Hanks' Balanced Salt Solution and the midgut was fixed  
374 with 4% paraformaldehyde in PBS/0.2% Tween-20 for 30 min. The fixed specimens  
375 were washed three times with PBS/0.4% Triton X-100 and blocked with 5% skim milk  
376 in PBS/0.2% Tween-20. Thereafter, the samples were incubated with primary  
377 antibodies at 4°C overnight, washed three times with PBS/0.2% Tween-20, and  
378 incubated with secondary antibodies for 3 h. After another three washes, the samples  
379 were mounted in Fluoro-KEEPER (12593-64; Nakalai Tesque, Kyoto, Japan). Images  
380 were acquired with a confocal microscope (Model TCSSPE; Leica Microsystems,  
381 Wetzlar, Germany) using its accompanying software and HC PLAN Apochromat 20×  
382 NA 0.7 and HCX PL objective lenses (Leica Microsystems). Images were processed  
383 with Adobe Photoshop® software (Adobe Systems Incorporated, San Jose, CA).

384

### 385 **Antibodies**

386 The following primary antibodies were used: rabbit anti-Mesh (955-1; 1:1000) (Izumi et  
387 al., 2012); rabbit anti-Tsp2A (302AP; 1:200) (Izumi et al., 2016); rabbit anti-Ssk  
388 (6981-1; 1:1000) (Yanagihashi et al., 2012); mouse anti-Dlg (4F3; Developmental  
389 Studies Hybridoma Bank (DSHB), Iowa City, IA; 1:50); mouse anti-Delta (C594.9B;

390 DSHB; 1:20); mouse anti-Pros (MR1A; DSHB; 1:20); rabbit anti-Pdm1 (a gift from Dr.  
391 Yu Cai; 1:500) (Yeo et al., 1995); rabbit anti-PH3 (06-570; Millipore, Darmstadt,  
392 Germany; 1:1000); rabbit anti-dpERK (Cell Signaling, Danvers, MA; 1:500); rat  
393 anti-GFP (GF090R; Nakalai Tesque; 1:1000); rabbit anti-GFP (598; MBL, Nagoya,  
394 Japan; 1:1000), and mouse anti- $\beta$ -galactosidase (Z3781; Promega, Madison, WI; 1:200).  
395 Alexa Fluor 488-conjugated (A21206; Thermo Fisher, Waltham, MA) and Cy3- and  
396 Cy5-conjugated (Jackson ImmunoResearch Laboratories, West Grove, PA) secondary  
397 antibodies were used at 1:400 dilution. Actin was stained with Alexa Fluor 568  
398 phalloidin (A12380; Thermo Fisher; 1:1000) or Alexa Fluor 647 phalloidin (A22287;  
399 Thermo Fisher; 1:1000). Nuclei were stained with propidium iodide (Nakalai Tesque;  
400 0.1 mg ml<sup>-1</sup>).

401

#### 402 **Electron microscopy and toluidine blue staining**

403 Adult control, *ssk-*, *mesh-*, and *Tsp2A*-RNAi flies at 5 days after transgene induction  
404 were dissected and fixed overnight at 4°C with a mixture of 2.5% glutaraldehyde and  
405 2% paraformaldehyde in 0.1 M cacodylate buffer (pH 7.4). The specimens including the  
406 midgut were prepared as described previously (Izumi et al., 2012). Ultrathin sections  
407 (50–100 nm) were double-stained with 4% hafnium (IV) chloride and lead citrate, and  
408 observed with a JEM-1011 electron microscope (JEOL, Tokyo, Japan) at an  
409 accelerating voltage of 80 kV. For toluidine blue staining, sections (0.5–1  $\mu$ m) mounted  
410 on glass slides were placed in 0.05% toluidine blue in distilled water for 2–30 min,

411 rinsed in water for 1 min, and allowed to air dry. The stained sections were observed  
412 with an optical microscope (BX41; Olympus, Tokyo, Japan).

413

#### 414 **Statistical analyses**

415 Statistical significance was evaluated by the Mann–Whitney *U*-test, Student's *t*-test  
416 (KaleidaGraph software; Synergy Software, Reading, PA), and Fisher's exact test.  
417 Values of  $p < 0.05$  were considered significant.

418

#### 419 **Barrier integrity assay (Smurf assay)**

420 Flies at 2–5 days of age were placed in empty vials containing a piece of paper soaked  
421 in 1% (wt/vol) Blue Dye No. 1 (Tokyo Chemical Industry, Tokyo, Japan)/5% sucrose  
422 solution at 50–60 flies/vial. After 2 days at 18°C, the flies were placed in new vials  
423 containing paper soaked in BlueDye/sucrose and transferred to 29°C. Loss of midgut  
424 barrier function was determined when dye was observed outside the gut (Rera et al.,  
425 2011, Rera et al., 2012). Flies were transferred to new vials every 2 days.

426

#### 427 **Acknowledgments**

428 We are grateful to all members of the Furuse laboratories for helpful discussions. We  
429 thank the Bloomington Drosophila Stock Center, Drosophila Genetic Resource Center  
430 at Kyoto Institute of Technology, and Fly Stocks of National Institute of Genetics  
431 (NIG-Fly) for fly stocks. We also thank Alison Sherwin, PhD, from Edanz Group  
432 ([www.edanzediting.com/ac](http://www.edanzediting.com/ac)) for editing a draft of this manuscript.

433

434 **Competing interests**

435 No competing interests declared.

436

437 **Author contributions**

438 Y.I. designed the research; Y.I. and K.F. performed the experiments; Y.I.

439 analyzed the data; Y.I. and M.F. wrote the paper.

440

441 **Funding**

442 This work was supported by a Grant-in-Aid for Scientific Research (C) (15K07048) to

443 YI from the Japan Society for the Promotion of Science.

444

445

445 **References**

446 **Anderson, J. M. and Van Itallie, C. M.** (2009). Physiology and function of the tight  
447 junction. *Cold Spring Harb Perspect Biol*, **1**, a002584.

448 **Banerjee, S., Sousa, A. D. and Bhat, M. A.** (2006). Organization and function of  
449 septate junctions: an evolutionary perspective. *Cell Biochem Biophys*, **46**, 65-77.

450 **Baumann, O.** (2001). Posterior midgut epithelial cells differ in their organization of the  
451 membrane skeleton from other drosophila epithelia. *Exp Cell Res*, **270**, 176-187.

452 **Biteau, B., Hochmuth, C. E. and Jasper, H.** (2008). JNK activity in somatic stem  
453 cells causes loss of tissue homeostasis in the aging *Drosophila* gut. *Cell Stem Cell*, **3**,  
454 442-455.

455 **Biteau, B. and Jasper, H.** (2011). EGF signaling regulates the proliferation of  
456 intestinal stem cells in *Drosophila*. *Development*, **138**, 1045-1055.

457 **Buchon, N., Broderick, N. A., Kuraishi, T. and Lemaitre, B.** (2010). *Drosophila*  
458 EGFR pathway coordinates stem cell proliferation and gut remodeling following  
459 infection. *BMC Biol*, **8**, 152.

460 **Chen, J., Sayadian, A. C., Lowe, N., Lovegrove, H. E. and St Johnston, D.** (2018).  
461 An alternative mode of epithelial polarity in the *Drosophila* midgut. *PLoS Biol*, **16**,  
462 e3000041.

463 **Furuse, M. and Izumi, Y.** (2017). Molecular dissection of smooth septate junctions:  
464 understanding their roles in arthropod physiology. *Ann N Y Acad Sci*, **1397**, 17-24.

465 **Furuse, M. and Tsukita, S.** (2006). Claudins in occluding junctions of humans and  
466 flies. *Trends Cell Biol*, **16**, 181-188.

- 467 **Gabay, L., Seger, R. and Shilo, B. Z.** (1997). MAP kinase in situ activation atlas  
468 during *Drosophila* embryogenesis. *Development*, **124**, 3535-3541.
- 469 **Guo, Z. and Ohlstein, B.** (2015). Stem cell regulation. Bidirectional Notch signaling  
470 regulates *Drosophila* intestinal stem cell multipotency. *Science*, **350**.
- 471 **Izumi, Y. and Furuse, M.** (2014). Molecular organization and function of invertebrate  
472 occluding junctions. *Semin Cell Dev Biol*, **36**, 186-193.
- 473 **Izumi, Y., Motoishi, M., Furuse, K. and Furuse, M.** (2016). A tetraspanin regulates  
474 septate junction formation in *Drosophila* midgut. *J Cell Sci*, **129**, 1155-1164.
- 475 **Izumi, Y., Yanagihashi, Y. and Furuse, M.** (2012). A novel protein complex,  
476 Mesh-Ssk, is required for septate junction formation in the *Drosophila* midgut. *J Cell*  
477 *Sci*, **125**, 4923-4933.
- 478 **Jiang, H. and Edgar, B. A.** (2009). EGFR signaling regulates the proliferation of  
479 *Drosophila* adult midgut progenitors. *Development*, **136**, 483-493.
- 480 **Jiang, H., Grenley, M. O., Bravo, M. J., Blumhagen, R. Z. and Edgar, B. A.** (2011).  
481 EGFR/Ras/MAPK signaling mediates adult midgut epithelial homeostasis and  
482 regeneration in *Drosophila*. *Cell Stem Cell*, **8**, 84-95.
- 483 **Jiang, H., Patel, P. H., Kohlmaier, A., Grenley, M. O., Mcewen, D. G. and Edgar,**  
484 **B. A.** (2009). Cytokine/Jak/Stat signaling mediates regeneration and homeostasis in the  
485 *Drosophila* midgut. *Cell*, **137**, 1343-1355.
- 486 **Lane, N. J., Dallai, R., Martinucci, G. and Burighel, P.** (1994). Electron microscopic  
487 structure and evolution of epithelial junctions. *Molecular Mechanisms of Epithelial Cell*  
488 *Junctions: From Development to Disease (ed. S. Citi)*, 23-43.

- 489 **Lee, T. and Luo, L.** (2001). Mosaic analysis with a repressible cell marker (MARCM)  
490 for *Drosophila* neural development. *Trends Neurosci*, **24**, 251-254.
- 491 **Lemaitre, B. and Miguel-Aliaga, I.** (2013). The digestive tract of *Drosophila*  
492 *melanogaster*. *Annu Rev Genet*, **47**, 377-404.
- 493 **Li, H. and Jasper, H.** (2016). Gastrointestinal stem cells in health and disease: from  
494 flies to humans. *Dis Model Mech*, **9**, 487-499.
- 495 **Micchelli, C. A. and Perrimon, N.** (2006). Evidence that stem cells reside in the adult  
496 *Drosophila* midgut epithelium. *Nature*, **439**, 475-479.
- 497 **Ohlstein, B. and Spradling, A.** (2006). The adult *Drosophila* posterior midgut is  
498 maintained by pluripotent stem cells. *Nature*, **439**, 470-474.
- 499 **Osman, D., Buchon, N., Chakrabarti, S., Huang, Y. T., Su, W. C., Poidevin, M.,**  
500 **Tsai, Y. C. and Lemaitre, B.** (2012). Autocrine and paracrine unpaired signaling  
501 regulate intestinal stem cell maintenance and division. *J Cell Sci*, **125**, 5944-5949.
- 502 **Rera, M., Bahadorani, S., Cho, J., Koehler, C. L., Ulgherait, M., Hur, J. H., Ansari,**  
503 **W. S., Lo, T., Jr., Jones, D. L. and Walker, D. W.** (2011). Modulation of longevity  
504 and tissue homeostasis by the *Drosophila* PGC-1 homolog. *Cell Metab*, **14**, 623-634.
- 505 **Rera, M., Clark, R. I. and Walker, D. W.** (2012). Intestinal barrier dysfunction links  
506 metabolic and inflammatory markers of aging to death in *Drosophila*. *Proc Natl Acad*  
507 *Sci U S A*, **109**, 21528-21533.
- 508 **Resnik-Docampo, M., Koehler, C. L., Clark, R. I., Schinaman, J. M., Sauer, V.,**  
509 **Wong, D. M., Lewis, S., D'alterio, C., Walker, D. W. and Jones, D. L.** (2017).  
510 Tricellular junctions regulate intestinal stem cell behaviour to maintain homeostasis.



- 511 *Nat Cell Biol*, **19**, 52-59.
- 512 **Salazar, A. M., Resnik-Docampo, M., Ulgherait, M., Clark, R. I., Shirasu-Hiza, M.,**  
513 **Jones, D. L. and Walker, D. W.** (2018). Intestinal Snakeskin Limits Microbial  
514 Dysbiosis during Aging and Promotes Longevity. *iScience*, **9**, 229-243.
- 515 **Singh, S. R., Liu, W. and Hou, S. X.** (2007). The adult *Drosophila* malpighian tubules  
516 are maintained by multipotent stem cells. *Cell Stem Cell*, **1**, 191-203.
- 517 **Tepass, U. and Hartenstein, V.** (1994). The development of cellular junctions in the  
518 *Drosophila* embryo. *Dev Biol*, **161**, 563-596.
- 519 **Tepass, U., Tanentzapf, G., Ward, R. and Fehon, R.** (2001). Epithelial cell polarity  
520 and cell junctions in *Drosophila*. *Annu Rev Genet*, **35**, 747-784.
- 521 **Wu, V. M. and Beitel, G. J.** (2004). A junctional problem of apical proportions:  
522 epithelial tube-size control by septate junctions in the *Drosophila* tracheal system.  
523 *Current opinion in cell biology*, **16**, 493-499.
- 524 **Xu, C., Tang, H. W., Hung, R. J., Hu, Y., Ni, X., Housden, B. E. and Perrimon, N.**  
525 (2019). The Septate Junction Protein Tsp2A Restricts Intestinal Stem Cell Activity via  
526 Endocytic Regulation of aPKC and Hippo Signaling. *Cell Rep*, **26**, 670-688 e676.
- 527 **Yanagihashi, Y., Usui, T., Izumi, Y., Yonemura, S., Sumida, M., Tsukita, S.,**  
528 **Uemura, T. and Furuse, M.** (2012). Snakeskin, a membrane protein associated with  
529 smooth septate junctions, is required for intestinal barrier function in *Drosophila*. *J Cell*  
530 *Sci*, **125**, 1980-1990.
- 531 **Yeo, S. L., Lloyd, A., Kozak, K., Dinh, A., Dick, T., Yang, X., Sakonju, S. and Chia,**  
532 **W.** (1995). On the functional overlap between two *Drosophila* POU homeo domain

533 genes and the cell fate specification of a CNS neural precursor. *Genes Dev*, **9**,

534 1223-1236.

535 **Zeng, X., Chauhan, C. and Hou, S. X.** (2010). Characterization of midgut stem cell-

536 and enteroblast-specific Gal4 lines in drosophila. *Genesis*, **48**, 607-611.

537 **Zhou, F., Rasmussen, A., Lee, S. and Agaisse, H.** (2013). The UPD3 cytokine couples

538 environmental challenge and intestinal stem cell division through modulation of

539 JAK/STAT signaling in the stem cell microenvironment. *Dev Biol*, **373**, 383-393.

540

540 **Figure legends**

541 **Figure 1. Depletion of sSJ-proteins from ECs in adult flies results in shortened**  
542 **lifespan and midgut barrier dysfunction.**

543 (A) Survival analysis of flies expressing *Myo1A<sup>ts</sup>*-Gal4/UAS-*CD8-GFP* without  
544 (control, *n*=240) or with UAS-*ssk*-RNAi (*n*=220), UAS-*mesh*-RNAi (15074R-1)  
545 (*n*=239), or UAS-*Tsp2A*-RNAi (11415R-2) (*n*=220). The transgenes were expressed  
546 with temperature-sensitive GAL80, and thus the flies were raised at 18°C until  
547 adulthood and then moved to 29°C. Each vial contained 20 flies (10 females, 10 males).

548 (B, C) Barrier integrity assays (Smurf assays). Flies expressing  
549 *Myo1A<sup>ts</sup>*-Gal4/UAS-*CD8-GFP* without or with UAS-*ssk*-RNAi, UAS-*mesh*-RNAi, or  
550 UAS-*Tsp2A*-RNAi were fed blue dye in sucrose solution. (B) Typical examples of the  
551 phenotypes at 5 days after transgene induction. (C) Left to right: Control (*CD8-GFP*)  
552 (*n*=264), *ssk*-RNAi *CD8-GFP* (*n*=375), *mesh*-RNAi *CD8-GFP* (*n*=531), and  
553 *Tsp2A*-RNAi *CD8-GFP* (*n*=508) at 3 days after induction, Control (*CD8-GFP*) (*n*=232),  
554 *ssk*-RNAi *CD8-GFP* (*n*=299), *mesh*-RNAi *CD8-GFP* (*n*=384), and *Tsp2A*-RNAi  
555 *CD8-GFP* (*n*=336) at 5 days after induction. Loss of midgut barrier function was  
556 determined when dye was observed outside the midgut. Flies with reduced sSJ-protein  
557 expression show loss of barrier function compared with control flies (*CD8-GFP* flies).  
558 The *p*-values in (C) represent significant differences in pairwise post-test comparisons  
559 indicated by the corresponding bars (Fisher's exact test).

560

561 **Figure 2. Depletion of sSJ-proteins from ECs leads to intestinal hypertrophy**

562 **accompanied by accumulation of morphologically aberrant ECs in the midgut.**

563 **(A–H)** Confocal images of the adult midgut expressing *MyoIA<sup>ts</sup>*-Gal4/UAS-*CD8-GFP*

564 without (A, E, control) or with UAS-*ssk*-RNAi (B, F), UAS-*mesh*-RNAi (C, G), or

565 UAS-*Tsp2A*-RNAi (D, H) at 5 days after induction stained for actin (red). CD8-GFP

566 driven by *MyoIA<sup>ts</sup>* was expressed in the ECs of each midgut. A large number of ECs

567 with aberrant morphology have accumulated in the anterior (B–D) and posterior (F–H)

568 midgut. The most posterior region of the *ssk*-RNAi midgut is severely expanded

569 (E–H). Scale bar: 50  $\mu$ m.

570 **(I)** Diameter of the most posterior region of the midgut. The diameter of the midgut was

571 measured just anterior to the Malpighian tubules. Left to right: Control (*CD8-GFP*)

572 (*n*=19), *ssk*-RNAi *CD8-GFP* (*n*=24), *mesh*-RNAi *CD8-GFP* (*n*=19), and *Tsp2A*-RNAi

573 *CD8-GFP* (*n*=22) at 5 days after induction. Error bars show s.e.m. Statistical

574 significance (*p*<0.0001) was evaluated by Student's *t*-test.

575 **(J–M)** Toluidine blue staining of the adult female anterior midgut in control

576 (*CD8-GFP*) (J), *ssk*-RNAi *CD8-GFP* (K), *mesh*-RNAi *CD8-GFP* (L), and *Tsp2A*-RNAi

577 *CD8-GFP* (M) flies at 5 days after induction. Stratification of cells in the midgut lumen

578 is observed in the *ssk*-RNAi midgut.

579 **(N–S)** Transmission electron microscopy of the adult female anterior midgut in control

580 (*CD8-GFP*) (N), *ssk*-RNAi *CD8-GFP* (O, R), *mesh*-RNAi *CD8-GFP* (P), and

581 *Tsp2A*-RNAi *CD8-GFP* (Q, S) flies at 5 days after induction. (R) and (S) are enlarged

582 views of the regions outlined by the black boxes in (O) and (Q), respectively.

583 Morphologically aberrant cells are stratified in the *ssk*-RNAi midgut (K–M).

584 Microvilli-like structures are found between stratified ECs in the sSJp-RNAi midgut  
585 (O, Q–S). Scale bars: 5  $\mu$ m (N–Q); 15  $\mu$ m (R, S). Mv, microvilli; VM, visceral muscles.

586

587 **Figure 3. Depletion of sSJ-proteins from ECs leads to increased ISC proliferation**  
588 **in the midgut.**

589 **(A–H)** Confocal images of the adult anterior midgut expressing  
590 *Myo1A<sup>ts</sup>-Gal4/UAS-CD8-GFP* without (A, E, control) or with UAS-*ssk*-RNAi (B, F),  
591 UAS-*mesh*-RNAi (C, G), or UAS-*Tsp2A*-RNAi (D, H) at 5 days after induction stained  
592 for PH3 (red in A–D), Delta (blue in A–D), dpERK (blue in E–H), and DNA  
593 (propidium iodide) (red in E–H). PH3-positive cells and Delta-positive cells are  
594 increased in the sSJ-protein-deficient midgut compared with the control midgut (A–D).  
595 Enhancement of Ras-MAPK pathway activity in the sSJ-protein-deficient midgut is  
596 shown by increased expression of dpERK (E–H). Scale bar: 50  $\mu$ m.

597 **(I–L)** Confocal images of the adult anterior midgut expressing  
598 *Myo1A<sup>ts</sup>-Gal4/10xSTAT-DGFP* without (I, control) or with UAS-*ssk*-RNAi (J),  
599 UAS-*mesh*-RNAi (K), or UAS-*Tsp2A*-RNAi (L) at 5 days after induction stained for  
600 GFP (green) and DNA (propidium iodide) (red). Enhancement of JAK-STAT pathway  
601 activity in sSJ-protein deficient midgut is shown by increased expression of the  
602 *10xSTAT-DGFP* reporter. Scale bar: 50  $\mu$ m.

603 **(M)** Quantification of PH3-positive cells. The dot-plots show the numbers of  
604 PH3-positive cells in individual midguts. Left to right: Control (*CD8-GFP*) ( $n=22$ ),  
605 *ssk*-RNAi *CD8-GFP* ( $n=28$ ), *mesh*-RNAi *CD8-GFP* ( $n=28$ ), and *Tsp2A*-RNAi

606 *CD8-GFP* ( $n=27$ ) at 3 days after induction, Control (*CD8-GFP*) ( $n=16$ ), *ssk*-RNAi  
607 *CD8-GFP* ( $n=21$ ), *mesh*-RNAi *CD8-GFP* ( $n=27$ ), and *Tsp2A*-RNAi *CD8-GFP* ( $n=27$ )  
608 at 5 days after induction. Bars and numbers in the graph represent the mean  
609 PH3-positive cells in the fly lines. Statistical significance ( $p<0.0001$ ) was evaluated by  
610 the Mann–Whitney *U*-test.

611

612 **Figure 4. Loss of *upd2* and *upd3* suppresses abnormal accumulation of ECs in the**  
613 ***mesh*-deficient midgut.**

614 **(A–C)** Confocal images of the *upd2,3<sup>d</sup>* (A), *Myo1A<sup>ts</sup>*-Gal4/UAS-*mesh*-RNAi (B), and  
615 *Myo1A<sup>ts</sup>*-Gal4/UAS-*mesh*-RNAi *upd2,3<sup>d</sup>* (C) male fly anterior midgut at 5 days after  
616 induction stained for PH3 (green) and DNA (propidium iodide) (red). In the  
617 *mesh*-RNAi and *mesh*-RNAi *upd2,3<sup>d</sup>* midgut, PH3-positive cells are increased  
618 compared with the *upd2,3<sup>d</sup>* midgut. Scale bar: 50  $\mu$ m.

619 **(D–F)** Confocal images of the *upd2,3<sup>d</sup>* (D), *Myo1A<sup>ts</sup>*-Gal4/UAS-*mesh*-RNAi (E), and  
620 *Myo1A<sup>ts</sup>*-Gal4/UAS-*mesh*-RNAi *upd2,3<sup>d</sup>* (F) male fly midgut at 5 days after induction  
621 stained for actin (blue). The diameter of the most posterior region of the *mesh*-RNAi  
622 midgut is severely expanded compared with the *upd2,3<sup>d</sup>* midgut. The diameter of the  
623 *mesh*-RNAi *upd2,3<sup>d</sup>* posterior midgut is reduced compared with the *mesh*-RNAi midgut.  
624 Scale bar: 50  $\mu$ m.

625 **(G)** Quantification of PH3-positive cells in the *mesh*-RNAi and *mesh*-RNAi *upd2,3<sup>d</sup>*  
626 male fly midgut. The dot-plots show the numbers of PH3-positive cells in individual  
627 midguts. Left to right: Control (+/*mesh*-RNAi) ( $n=26$ ), *upd2,3<sup>d</sup>* ( $n=19$ ), *mesh*-RNAi

628 (*Myo1A<sup>ts</sup>/mesh-RNAi*) ( $n=22$ ), and *mesh-RNAi upd2,3<sup>A</sup>* (*upd2,3<sup>A</sup>, Myo1A<sup>ts</sup>*  
629 */mesh-RNAi*) ( $n=18$ ) at 3 and 5 days after induction. The bars and numbers in the graph  
630 represent the mean PH3-positive cells in the fly lines. Statistical significance was  
631 evaluated by the Mann–Whitney *U*-test.

632 **(H)** Diameter of the most posterior region of Control (*+/mesh-RNAi*) ( $n=27$ ), *upd2,3<sup>A</sup>*  
633 ( $n=16$ ), *mesh-RNAi (Myo1A<sup>ts</sup>/mesh-RNAi)* ( $n=23$ ), and *mesh-RNAi upd2,3<sup>A</sup>(upd2,3<sup>A</sup>,*  
634 *Myo1A<sup>ts</sup> /mesh-RNAi)* ( $n=19$ ) male fly midgut at 3 and 5 days after induction. The  
635 diameter of the midgut was measured just anterior to the Malpighian tubules. Error bars  
636 show s.e.m. Statistical significance was evaluated by Student's *t*-test.

637

638 **Figure 5. *Tsp2A*-mutant clones induce non-cell-autonomous stem cell proliferation.**

639 **(A–F)** Confocal images of the midgut from control clones (A, C, E) or *Tsp2A<sup>l-2</sup>* mutant  
640 clones (B, D, F) stained for GFP (green in A–F), PH3 (red in A, B), Pdm1 (red in C and  
641 D), and Pros (red in E and F). Control and *Tsp2A<sup>l-2</sup>* mutant clones were generated using  
642 the MARCM system and marked by GFP expression. The *Tsp2A<sup>l-2</sup>* mutant clones  
643 induce cell division of neighboring cells (arrows in B). In the *Tsp2A<sup>l-2</sup>* mutant clones,  
644 Pdm1- and Pros-positive cells are generated, similar to the control clones (arrows in  
645 C–F). Scale bar: 50  $\mu$ m.

646 **(G)** Quantification of average clone size for control and *Tsp2A<sup>l-2</sup>* mutant clones. Error  
647 bars show s.e.m. Statistical significance was evaluated by the Mann–Whitney *U*-test.  
648 NS, not significant.

649 **(H)** Quantification of control and *Tsp2A<sup>l-2</sup>* mutant clones containing PH3-positive cells

650 on the inside or outside of the clones. A total of 107 control clones and 197 *Tsp2A*<sup>1-2</sup>  
651 mutant clones were counted (each clone contained >2 cells). The *p*-value represents a  
652 significant difference in pairwise post-test comparisons indicated by the corresponding  
653 bars (Fisher's exact test). NS, not significant.

654

655 **Figure S1. Dlg is mislocalized in sSJ-protein-deficient ECs.**

656 (A–D') Confocal images of the adult anterior midgut expressing  
657 *Myo1A*<sup>ts</sup>-Gal4/UAS-*CD8-GFP* without (A, A', control) or with UAS-*ssk*-RNAi (B, B'),  
658 UAS-*mesh*-RNAi (C, C'), or UAS-*Tsp2A*-RNAi (D, D') at 5 days after induction  
659 stained for Dlg (red). The images show an optical cross-section through the center of the  
660 midgut. Scale bar: 20 μm.

661

662 **Figure S2. Expression of sSJp-RNAis in ECs leads to decreased levels of the**  
663 **respective target proteins and mislocalization of other sSJ-proteins in the midgut.**

664 (A–L') Confocal images of the adult anterior midgut expressing  
665 *Myo1A*<sup>ts</sup>-Gal4/UAS-*CD8-GFP* without (A, A', E, E', I, I', control) or with  
666 UAS-*ssk*-RNAi (B, B', F, F', J, J'), UAS-*mesh*-RNAi (C, C', G, G', K, K'), or  
667 UAS-*Tsp2A*-RNAi (D, D', H, H', L, L') at 5 days after induction stained for Ssk (red in  
668 A–D), Mesh (red in E–H), Tsp2A (red in I–L), and actin (blue in A'–L'). Scale bar: 50  
669 μm.

670



671 **Figure S3. Expression of additional RNAi lines of *mesh* and *Tsp2A* in the adult**  
672 **midgut causes increased ISC proliferation and intestinal hypertrophy.**

673 (A–F) Confocal images of the adult anterior (A–C) and posterior (D–F) midgut  
674 expressing *Myo1A<sup>ts</sup>-Gal4/UAS-CD8-GFP* with UAS-*white*-RNAi (JF01545) (A, D,  
675 control), UAS-*mesh*-RNAi (12074R-2) (B, E), or UAS-*Tsp2A*-RNAi (*Tsp2AIR1-2*) (C,  
676 F) at 5 days after induction stained for PH3 (red in A–C) and actin (red in D–F). The  
677 dots in (A–C) show the outline of the midgut. Scale bar: 50  $\mu$ m.

678 (G) Quantification of PH3-positive cells. The number of PH3-positive cells per midgut  
679 was counted at 5 days after induction. The dot-plots show the numbers of PH3-positive  
680 cells in individual midguts. Left to right: Control (*white*-RNAi *CD8-GFP*) ( $n=38$ ),  
681 *mesh*-RNAi *CD8-GFP* ( $n=17$ ), and *Tsp2A*-RNAi *CD8-GFP* ( $n=15$ ). The bars and  
682 numbers in the graph represent the mean PH3-positive cells in the fly lines. Statistical  
683 significance was evaluated by the Mann–Whitney *U*-test.

684 (H) Diameter of the most posterior region of the midgut. The diameter of the midgut  
685 was measured just anterior to the Malpighian tubules at 5 days after induction. Left to  
686 right: Control (*white*-RNAi *CD8-GFP*) ( $n=23$ ), *mesh*-RNAi *CD8-GFP* ( $n=14$ ), and  
687 *Tsp2A*-RNAi *CD8-GFP* ( $n=17$ ). Error bars show s.e.m. Statistical significance was  
688 evaluated by Student's *t*-test.

689

690 **Figure S4. Depletion of *ssk* and *mesh* from ECs leads to an increase in**  
691 **Esg-LacZ-positive cells.**

692 (A–F'') Confocal images of the adult anterior midgut expressing  
693 *Myo1A<sup>ts</sup>-Gal4/UAS-CD8-GFP/esh-lacZ* without (A, D, D', D'', control) or with  
694 UAS-*ssk*-RNAi (B, E, E', E'') or UAS-*mesh*-RNAi (C, F, F', F'') at 5 days after  
695 induction stained for  $\beta$ -galactosidase (green in A–C, red in D', D'', E', E'', F', F'').  
696 The images show an optical cross-section through the center of the midgut (D–F''). The  
697 arrows in D–F'' indicate CD8-GFP-driven *Myo1A-GAL4* and *Esg-LacZ*  
698 double-positive cells. Scale bar: 50  $\mu$ m.

699

700 **Figure S5. The Ras-MAP kinase pathway is activated in some ECs in the**  
701 **sSJ-protein-deficient midgut.**

702 (A–D) Confocal images of the adult anterior midgut expressing  
703 *Myo1A<sup>ts</sup>-Gal4/UAS-CD8-GFP* without (A, control) or with UAS-*ssk*-RNAi (B),  
704 UAS-*mesh*-RNAi (C), or UAS-*Tsp2A*-RNAi (D) at 5 days after induction stained for  
705 dpERK (red). The arrows indicate CD8-GFP-driven *Myo1A-GAL4* (green) and dpERK  
706 double-positive cells. Scale bar: 50  $\mu$ m.

707 (E–L) Confocal images of the adult anterior midgut expressing  
708 *Myo1A<sup>ts</sup>-Gal4/10xSTAT-DGFP* without (E, I, control) or with UAS-*ssk*-RNAi (F, J),  
709 UAS-*mesh*-RNAi (G, K), or UAS-*Tsp2A*-RNAi (H, L) at 5 days after induction stained  
710 for GFP (green in E–L), DNA (propidium iodide) (red in E–H), and actin (red in I–L).  
711 (E and I), (F and J), (K and L), and (H and L) are each derived from the same sample.  
712 The images show an optical cross-section through the center of the midgut (A–L). Scale  
713 bar: 50  $\mu$ m.

714

715 **Figure S6. The Ras-MAP kinase and Jak-Stat pathways are activated in**  
716 **Esg-LacZ-positive cells in the *mesh*-deficient midgut.**

717 **(A–D'')** Confocal images of the adult posterior midgut expressing  
718 *Myo1A<sup>ts</sup>-Gal4/UAS-CD8-GFP/esg-lacZ* without (A–A'', C–C'', control) or with  
719 UAS-*mesh*-RNAi (B–B'', D–D'') at 5 days after induction stained for  $\beta$ -galactosidase  
720 (red in A', A'', B', B'', C', C'', D', D''), dpERK (green in A, A'', B, B''), and GFP  
721 (green in C, C'', D, D''). (A and C) and (B and D) are each derived from the same  
722 sample. Scale bar: 50  $\mu$ m.

723

724 **Figure S7. Depletion of *mesh* from ECs results in shortened lifespan and midgut**  
725 **barrier dysfunction in *upd2,3<sup>d</sup>* mutant flies.**

726 **(A)** Survival analysis of *upd2,3<sup>d</sup>* ( $n=240$ ), *Myo1A<sup>ts</sup>-Gal4/UAS-mesh*-RNAi ( $n=180$ ), and  
727 *Myo1A<sup>ts</sup>-Gal4/UAS-mesh*-RNAi *upd2,3<sup>d</sup>* ( $n=260$ ) male flies. Each vial contained 20  
728 male flies.

729 **(B)** Barrier integrity assays (Smurf assays). In these assays, *upd2,3<sup>d</sup>* ( $n=209$ ),  
730 *Myo1A<sup>ts</sup>-Gal4/UAS-mesh*-RNAi ( $n=192$ ), and *Myo1A<sup>ts</sup>-Gal4/UAS-mesh*-RNAi *upd2,3<sup>d</sup>*  
731 ( $n=152$ ) male flies were fed blue dye in sucrose solution. At 5 days after induction, the  
732 phenotypes were examined. The  $p$ -values represent significant differences in pairwise  
733 post-test comparisons indicated by the corresponding bars (Fisher's exact test).

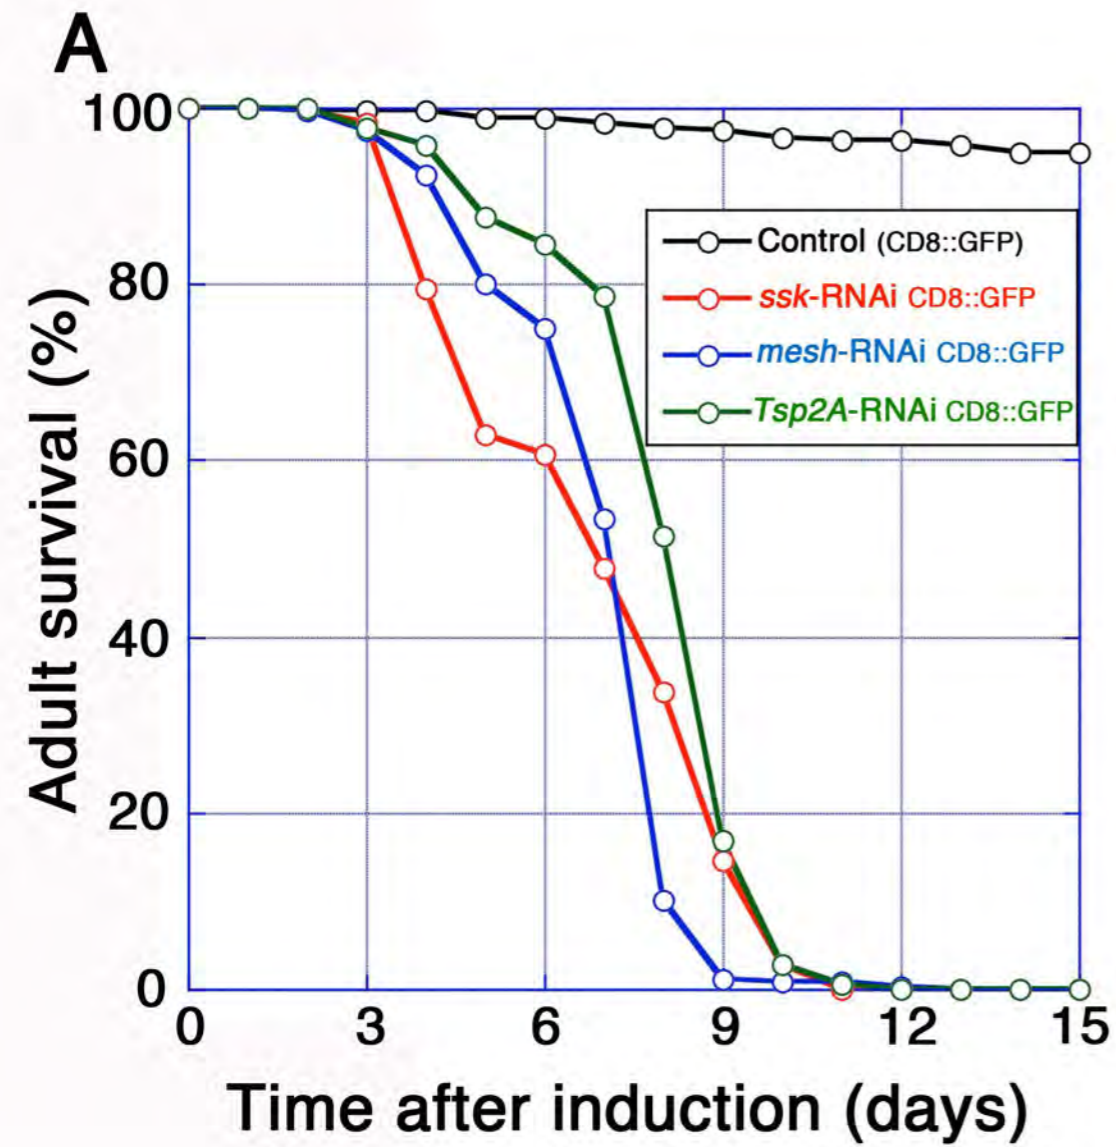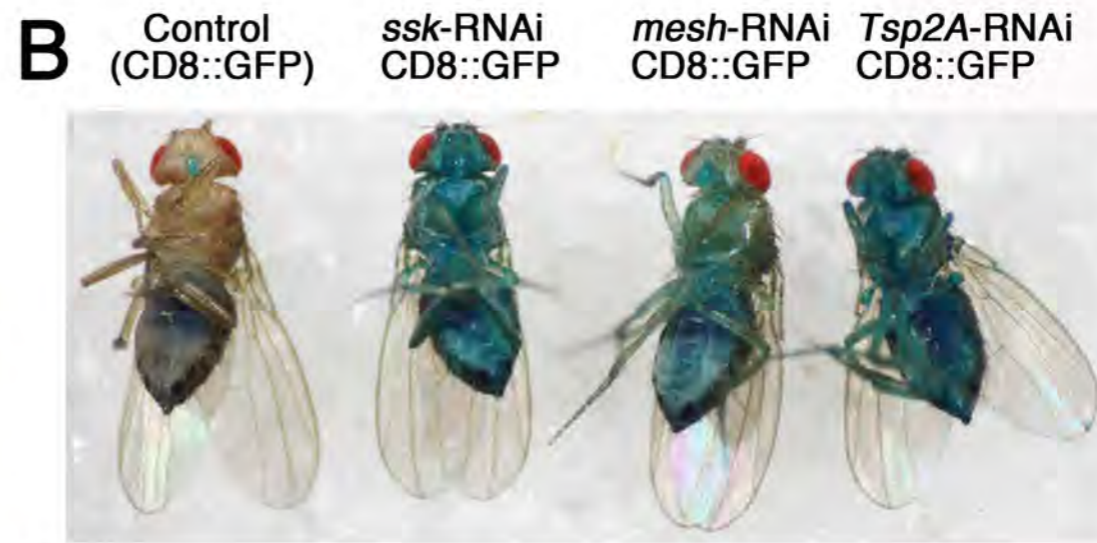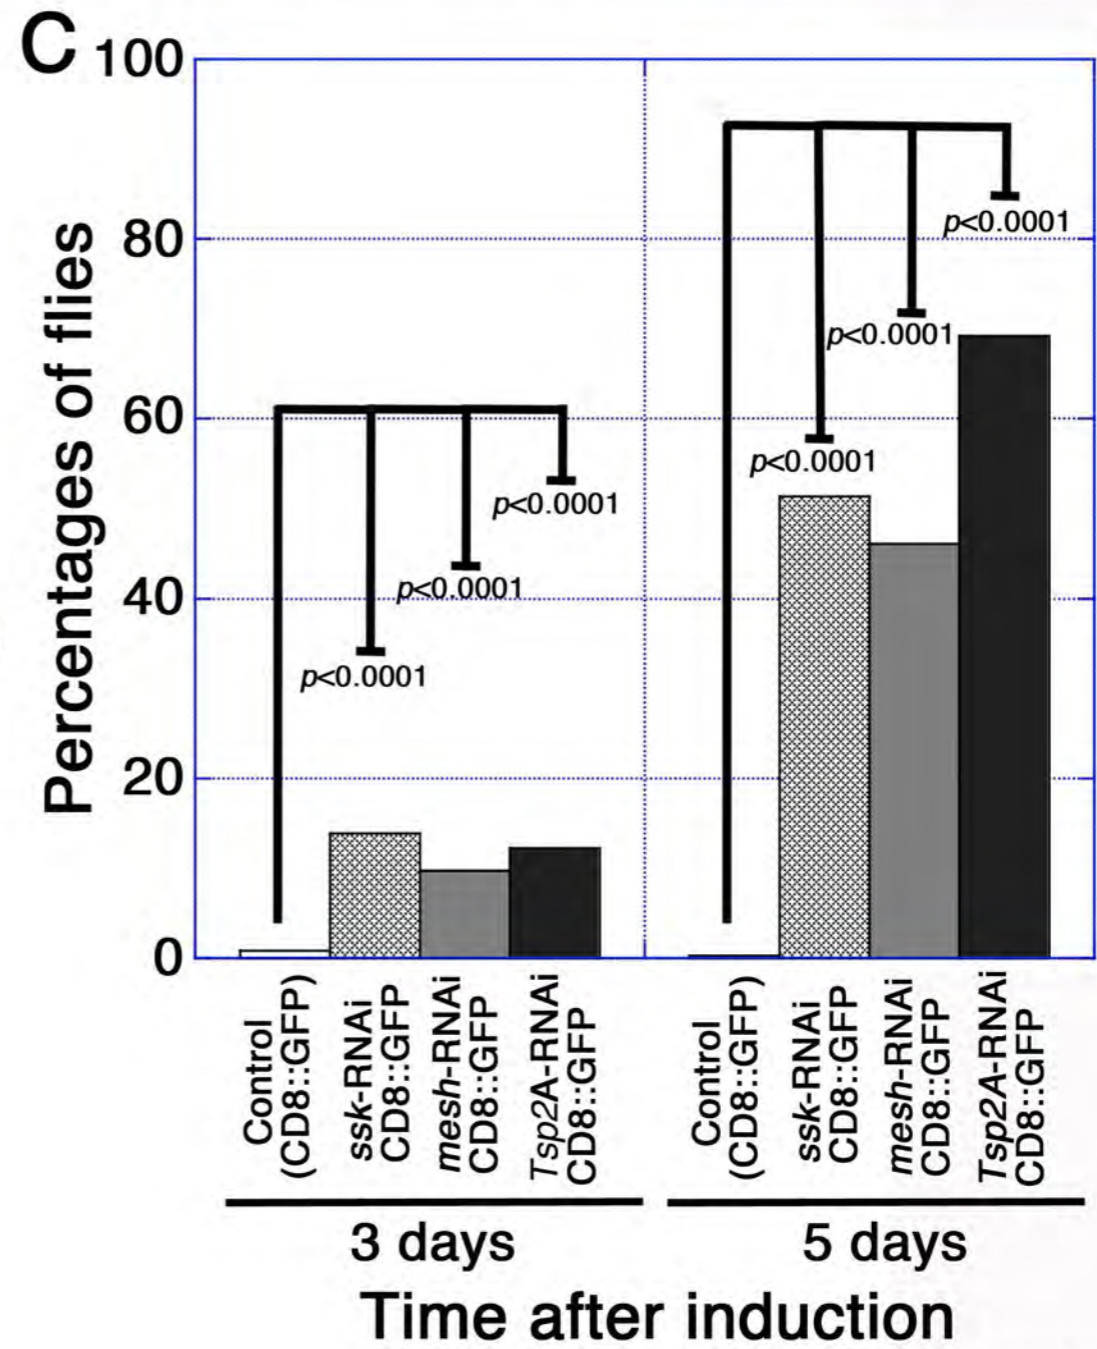



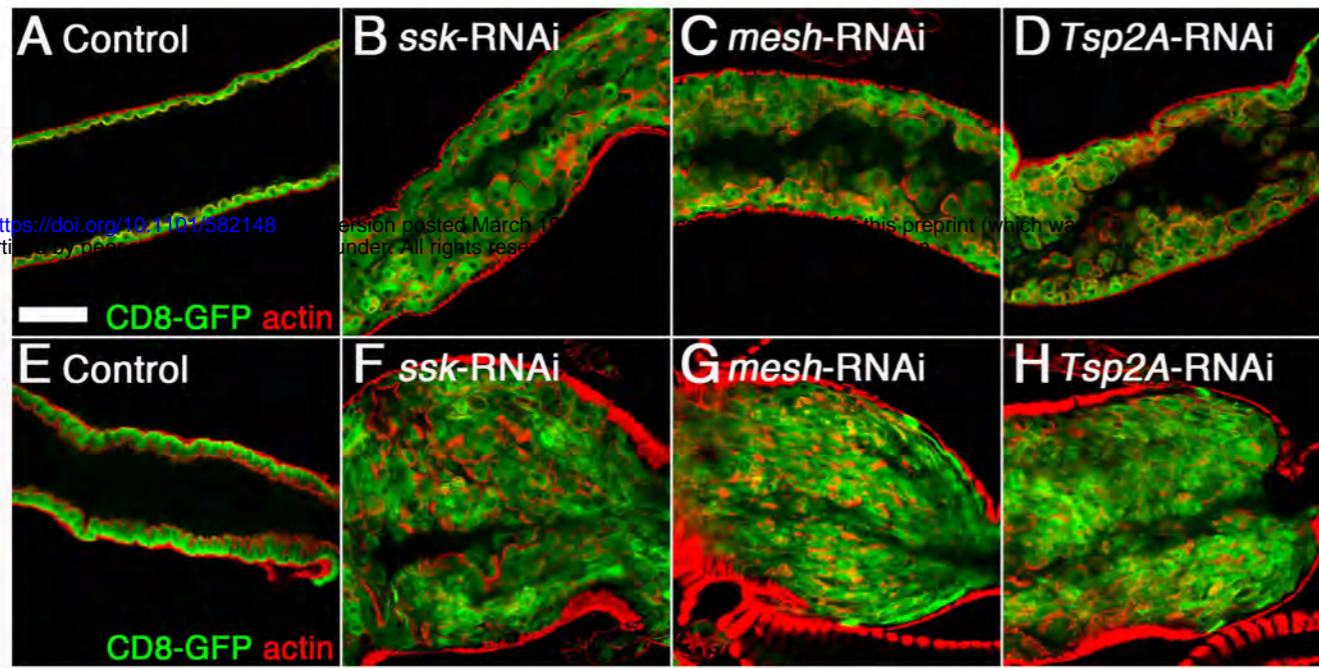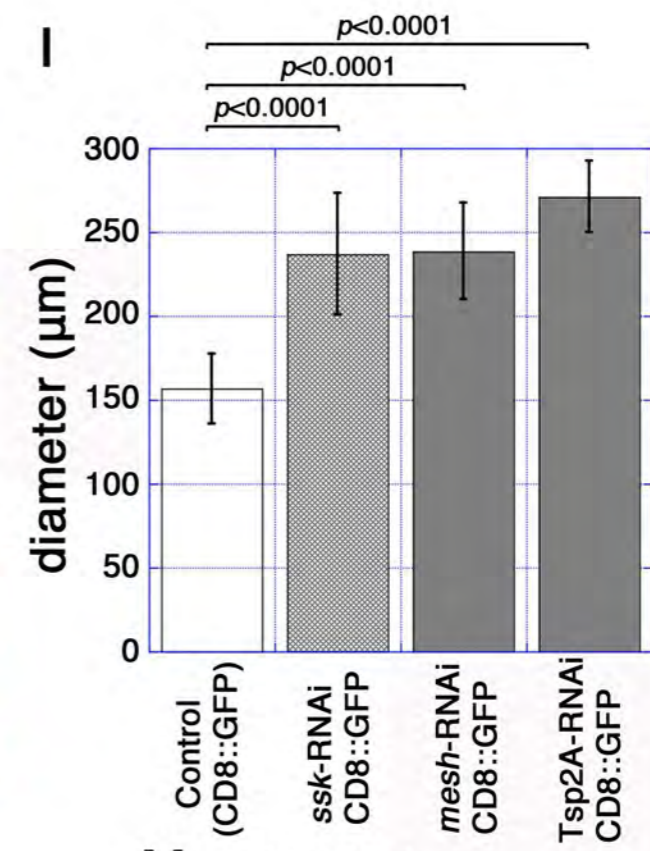

J Control

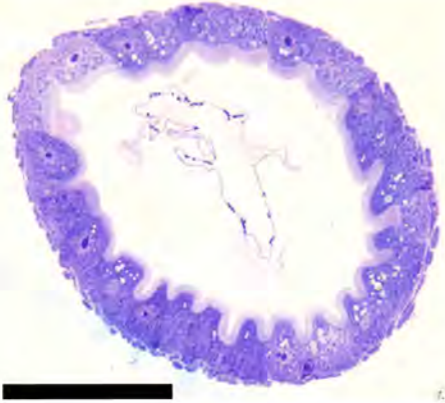

K *ssk*-RNAi

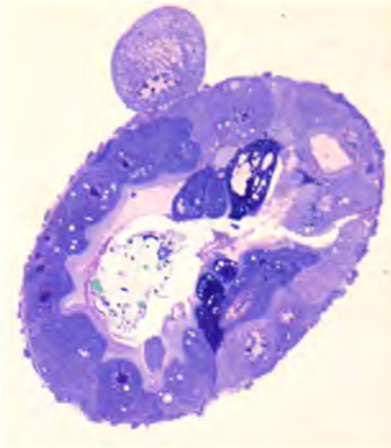

L *mesh*-RNAi

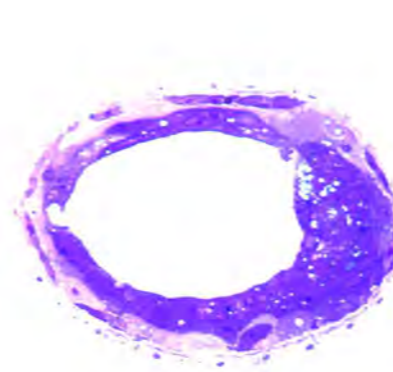

M *Tsp2A*-RNAi

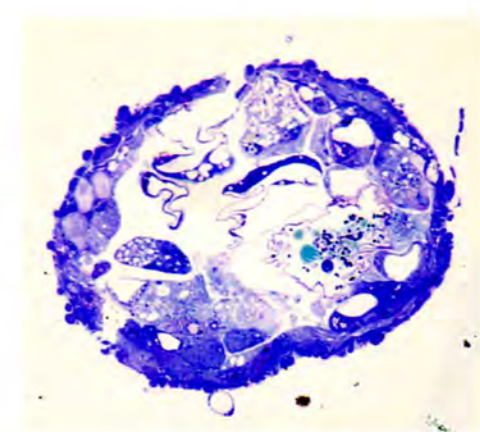

N Control

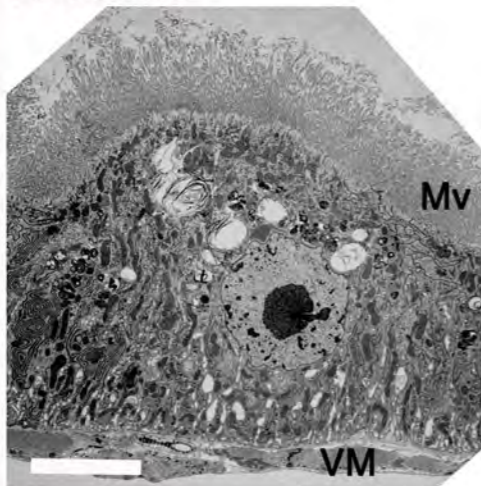

O *ssk*-RNAi

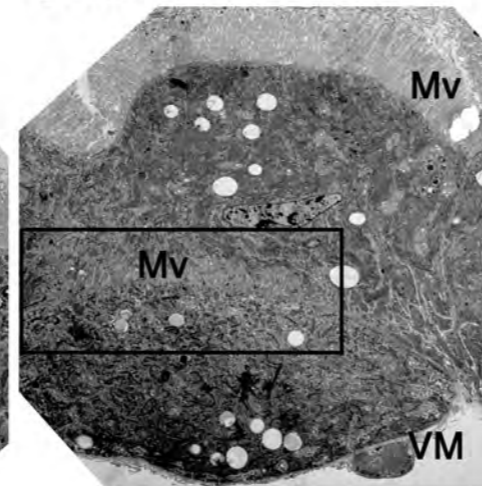

P *mesh*-RNAi

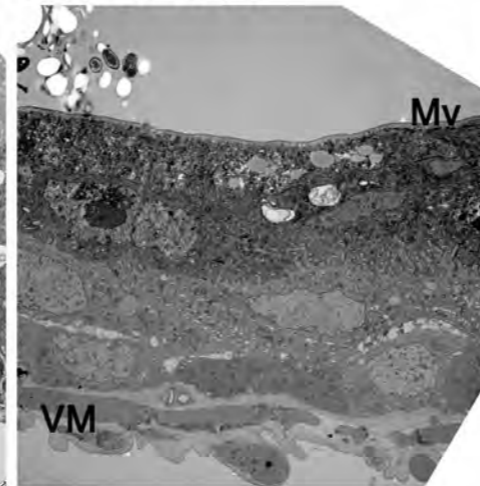

Q *Tsp2A*-RNAi

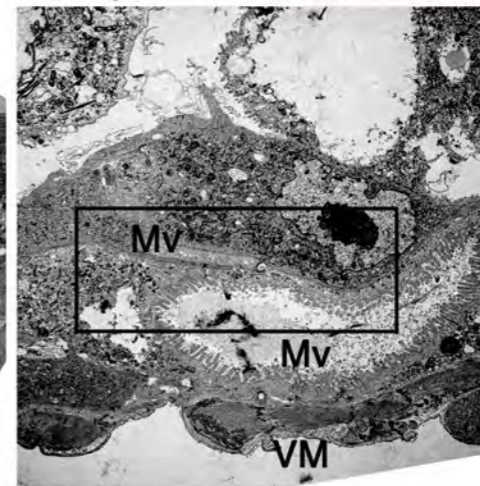

R *ssk*-RNAi

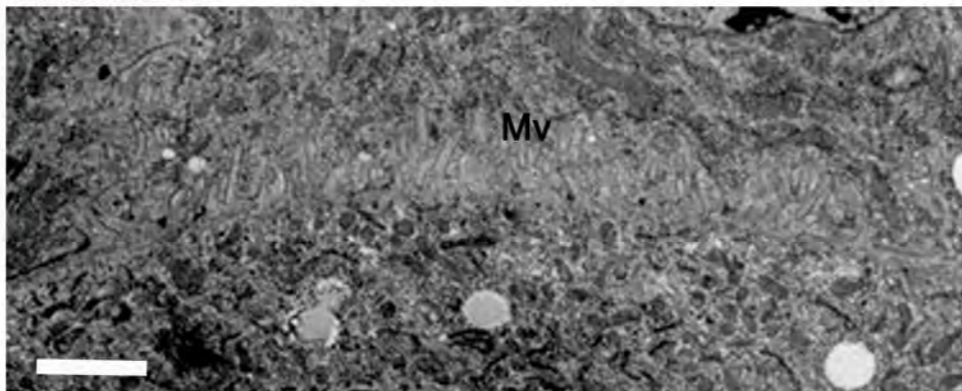

S *Tsp2A*-RNAi

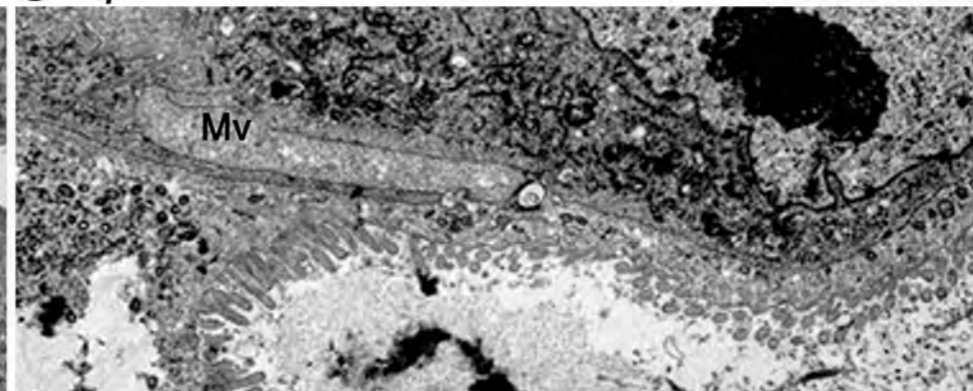



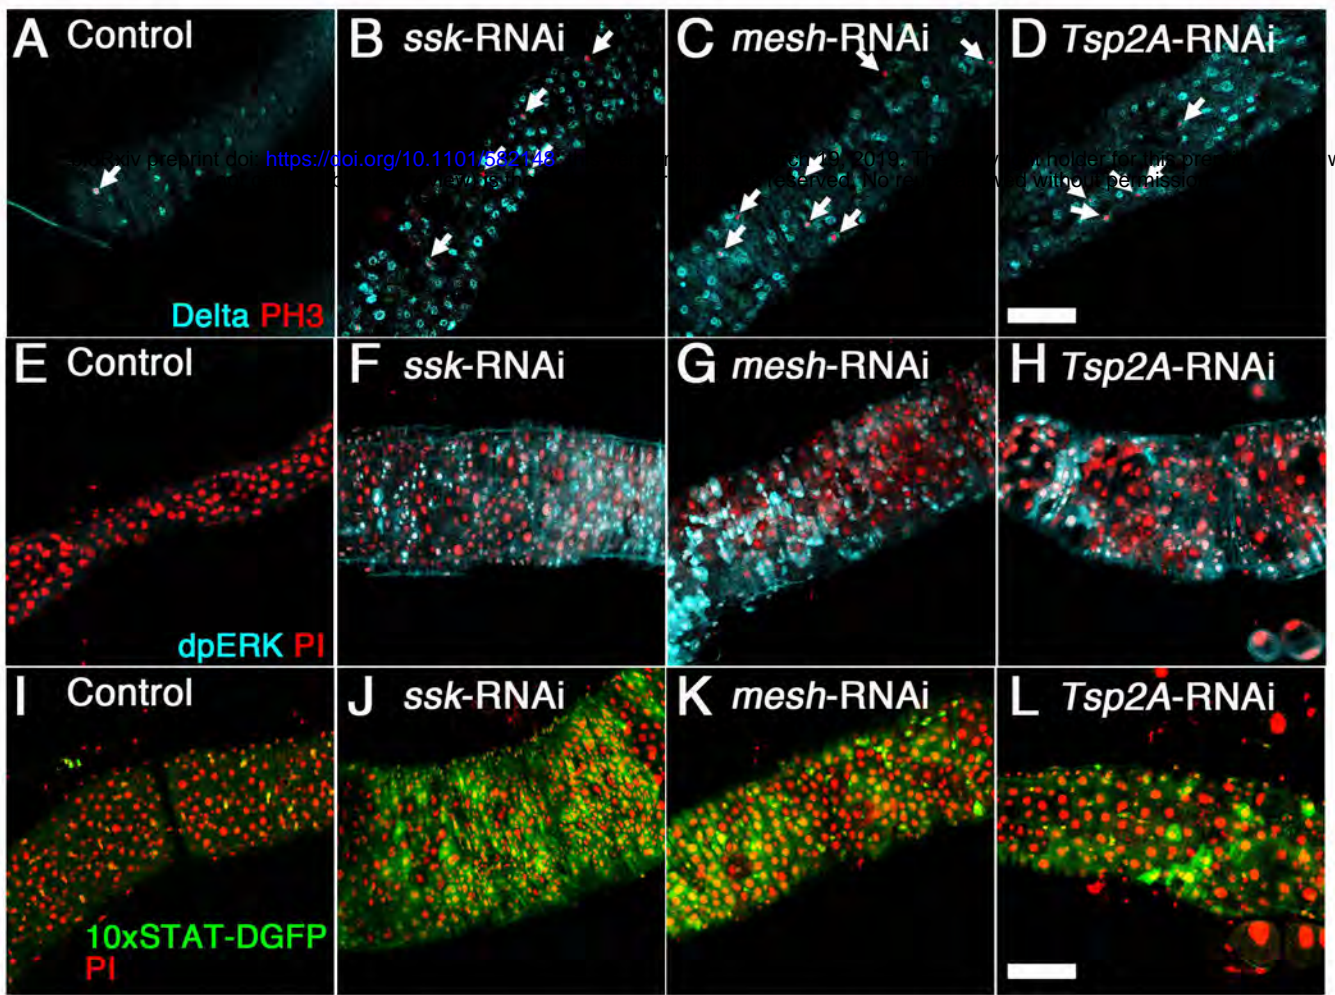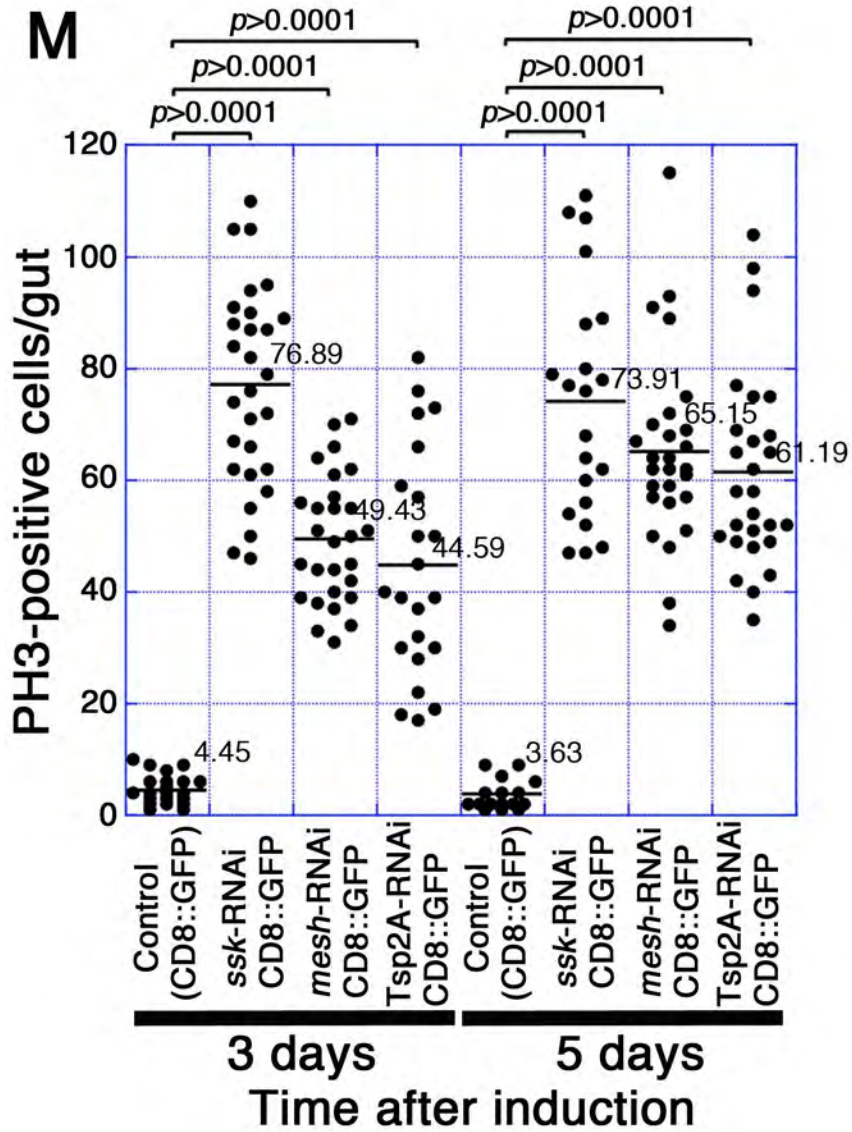





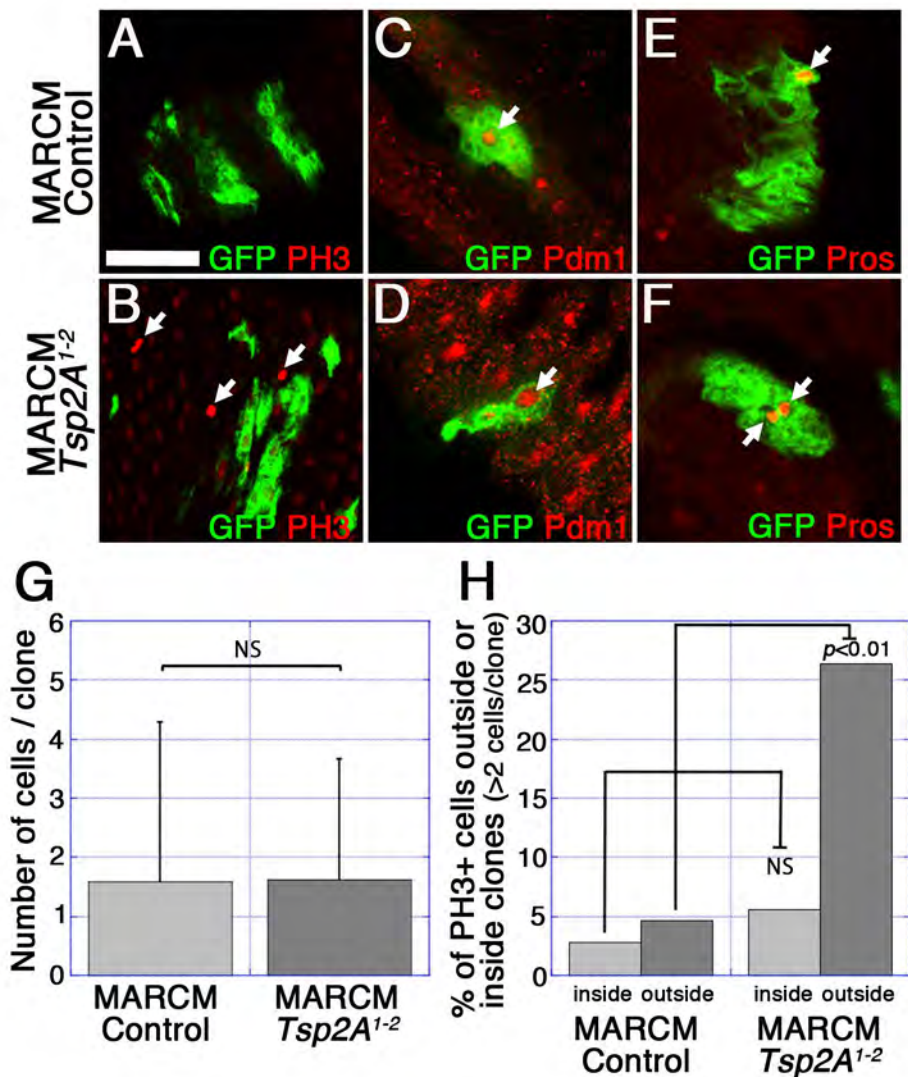

Izumi et al., Figure 5



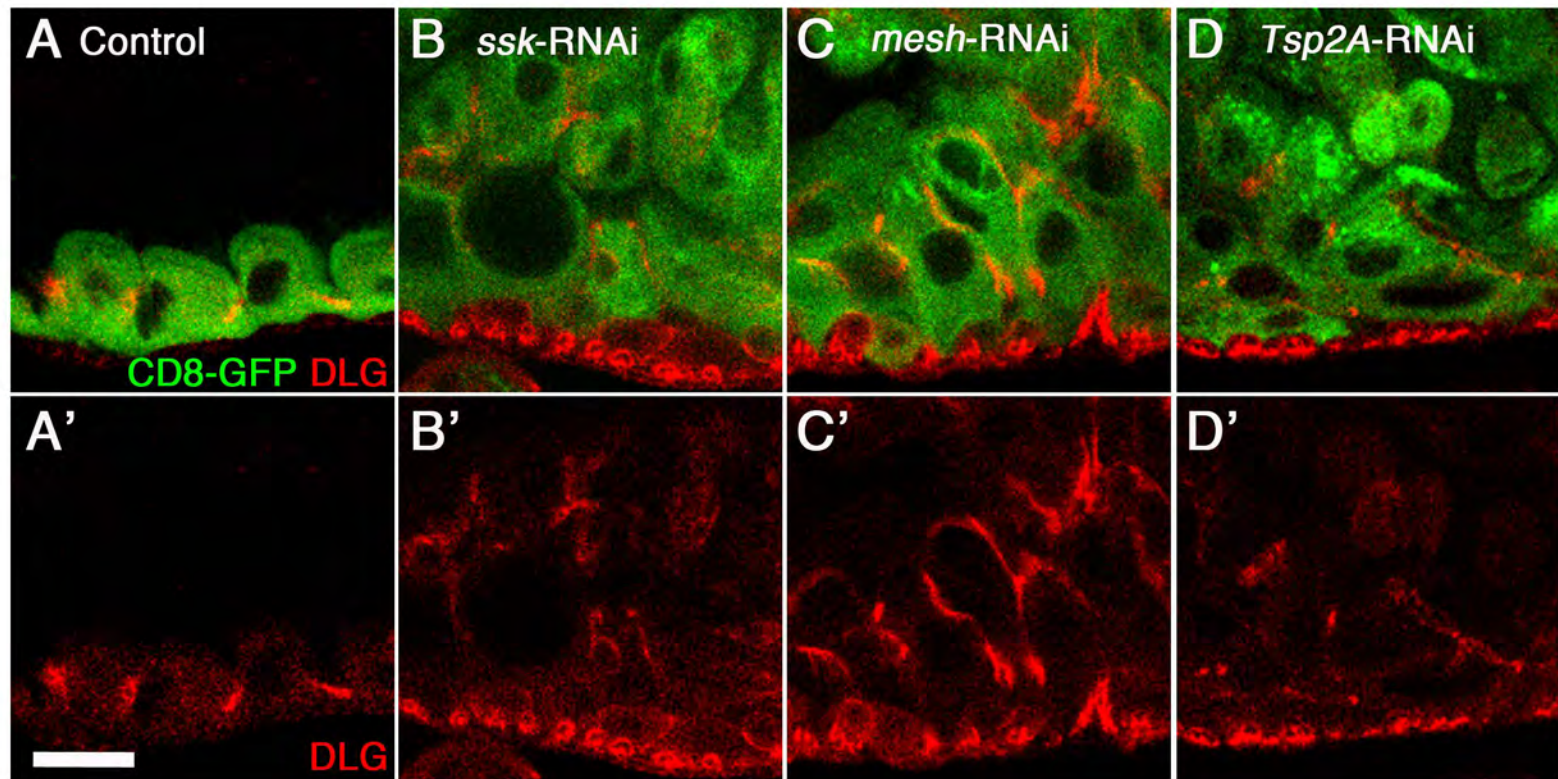

Izumi et al., Figure S1

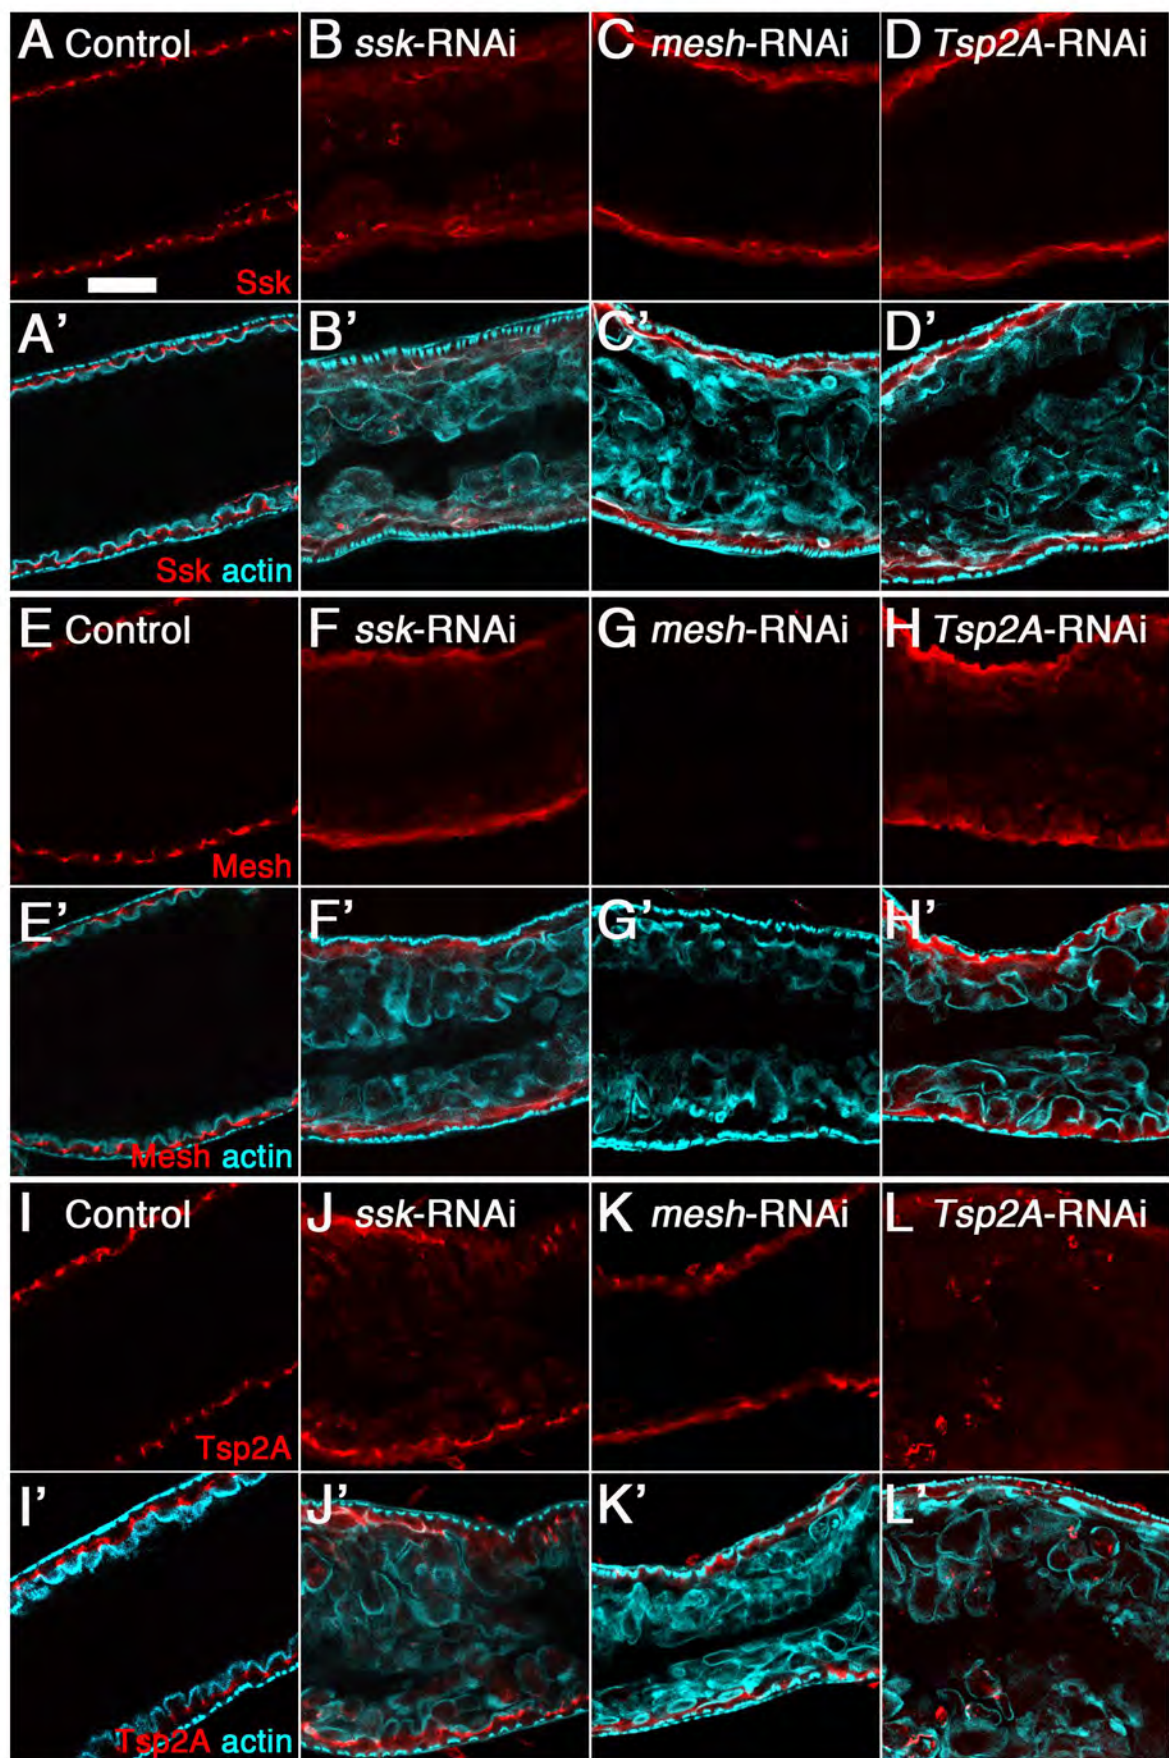



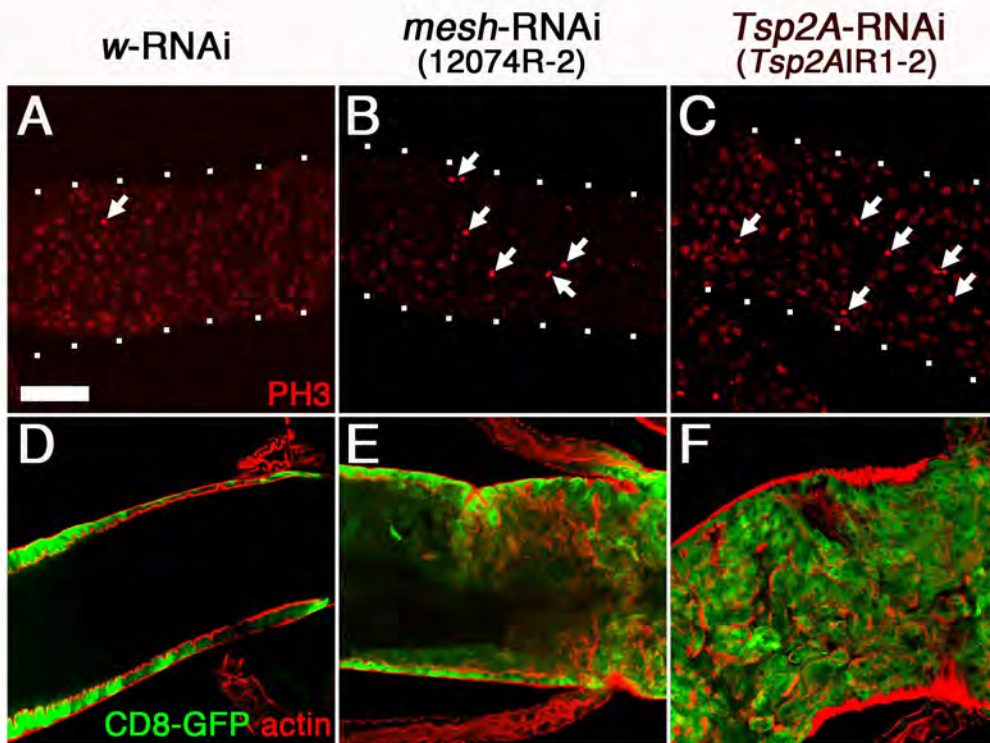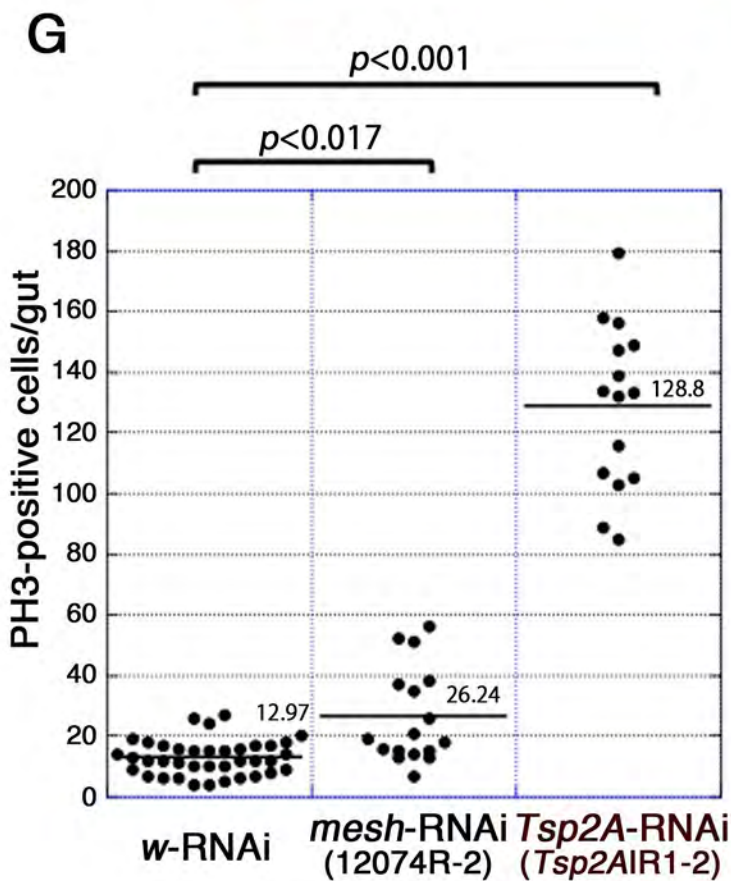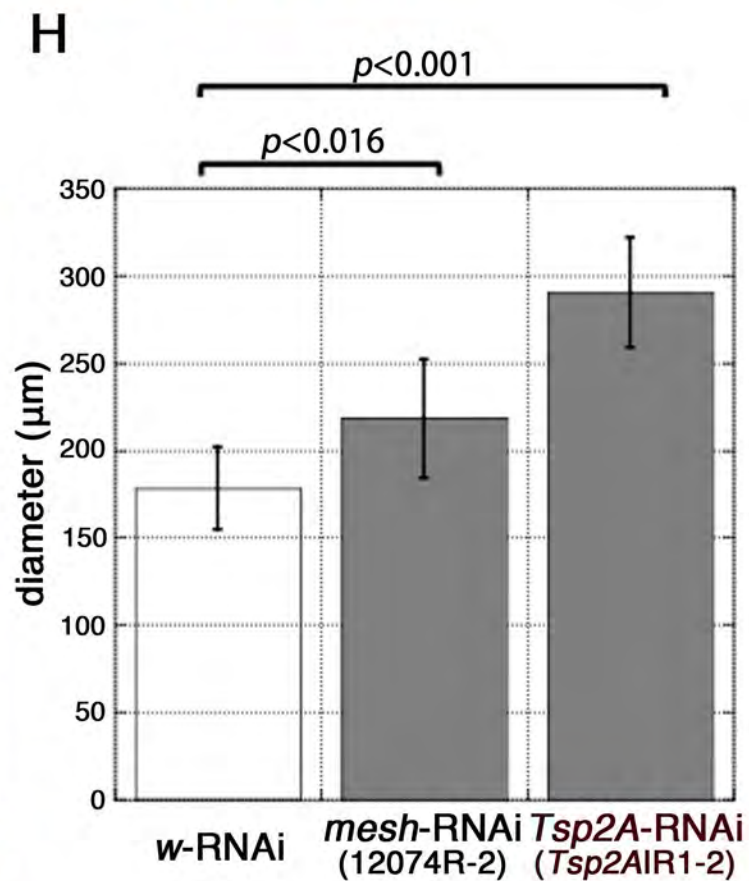

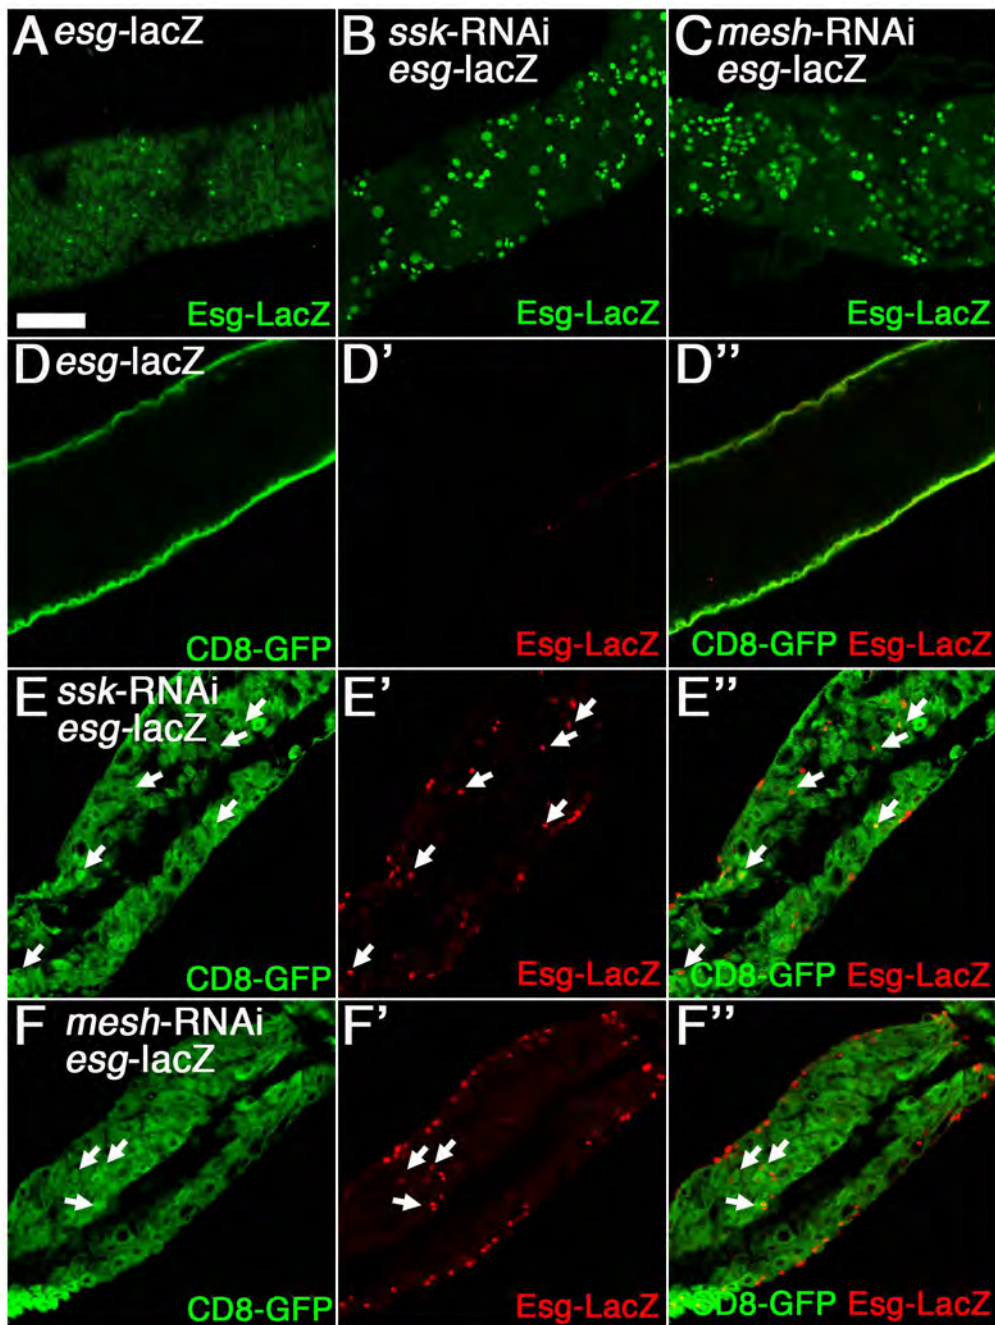

Izumi et al., Figure S4

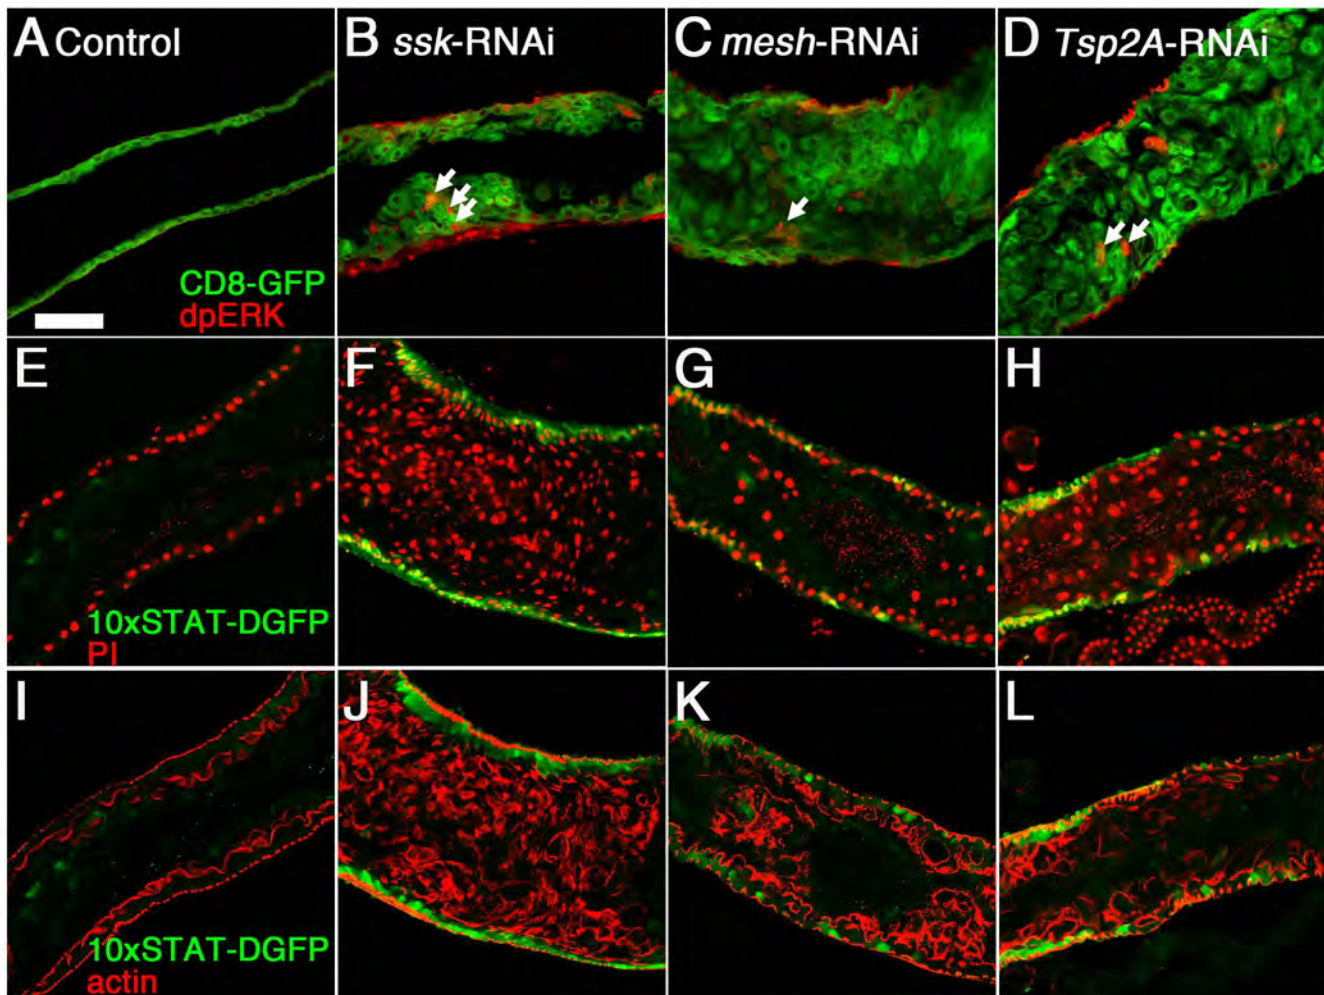

Izumi et al., Figure S5



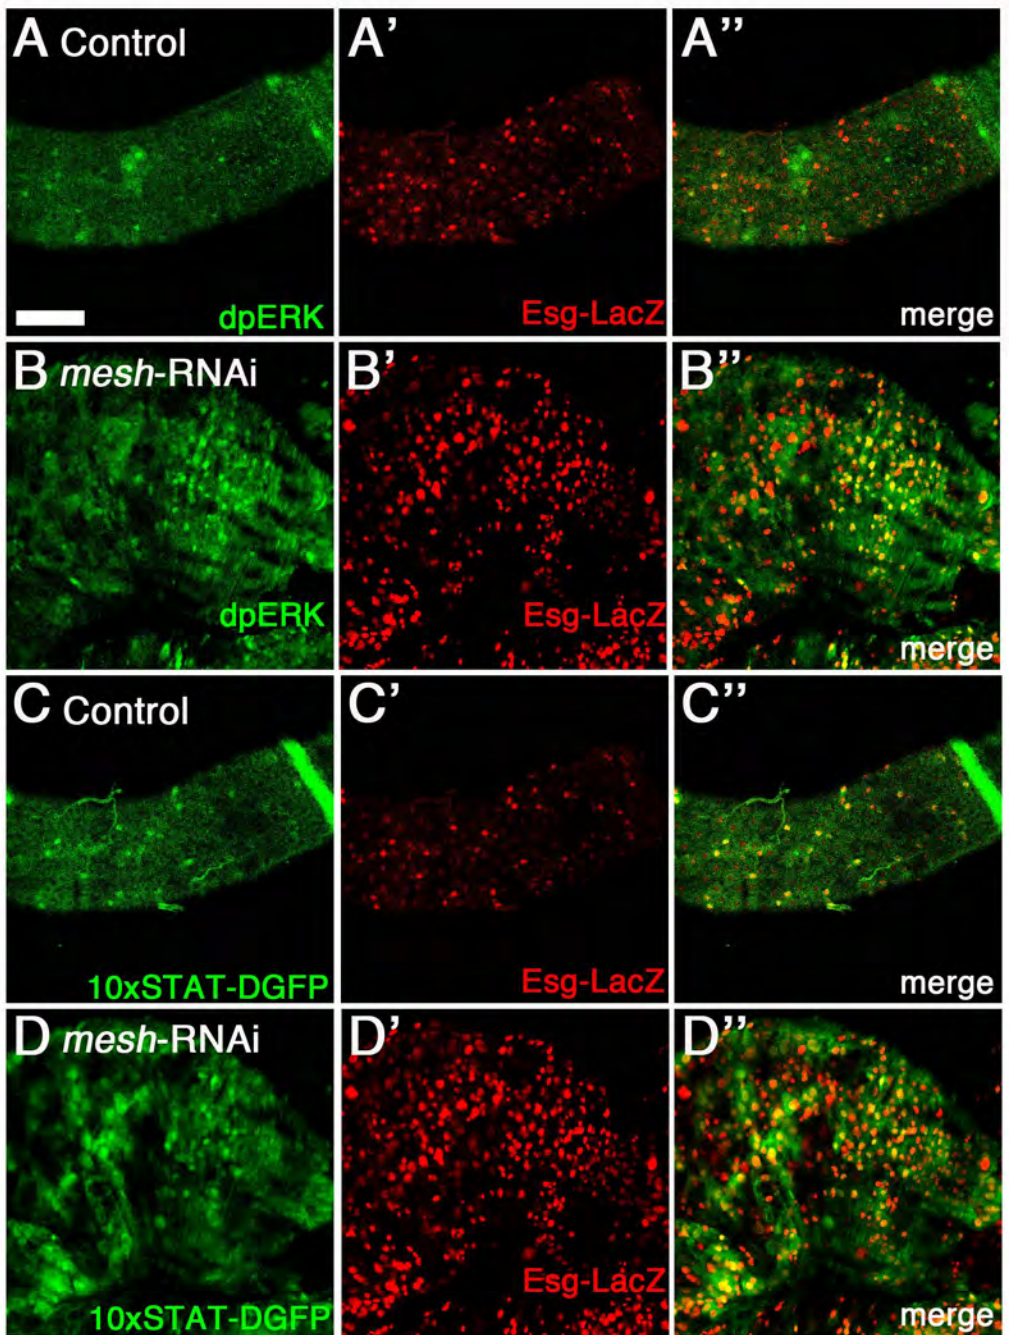

Izumi et al., Figure S6

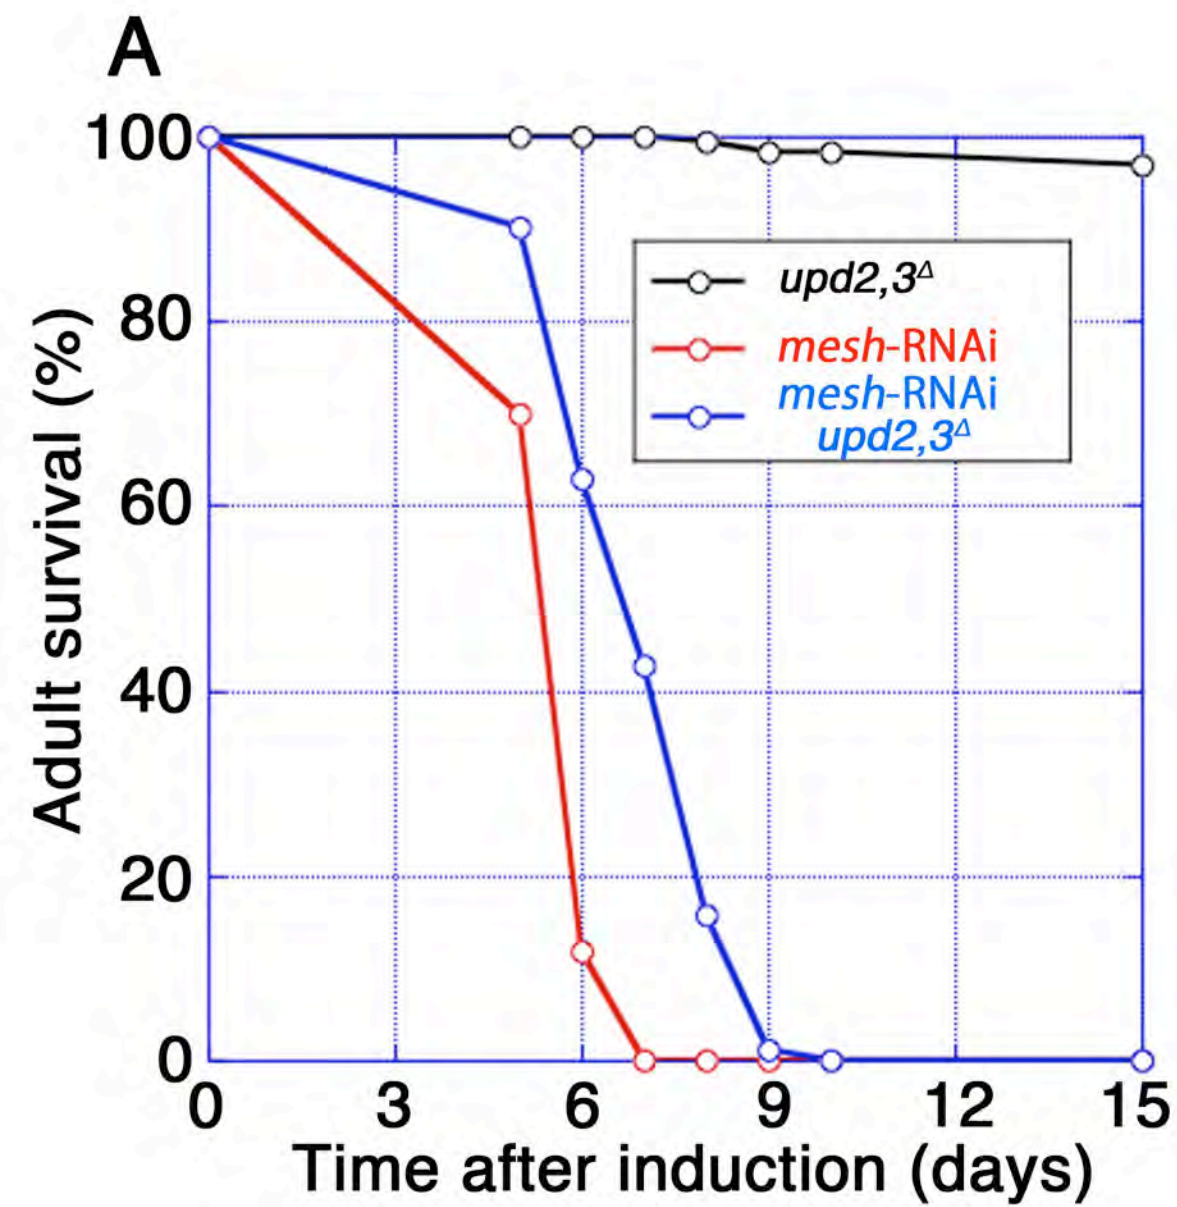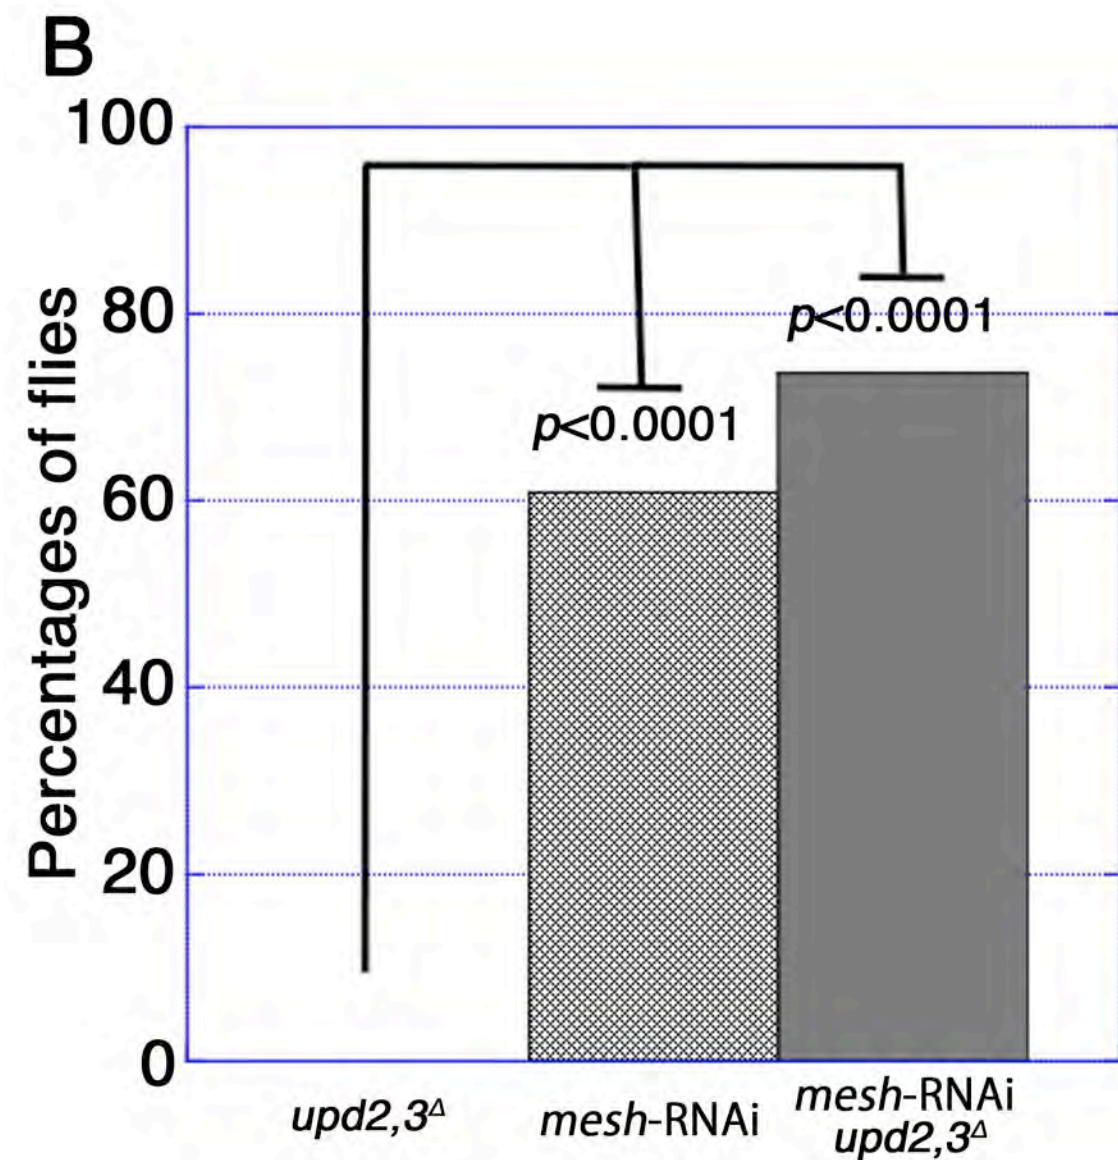

Source: https://www.biorxiv.org/content/10.1101/582148v1.full.pdf
